# Supplementary material for: Continental variation in wing pigmentation in Calopteryx damselflies is related to the presence of heterospecifics
Source: PeerJ. 2014 Jun 10;2:e438. doi: 10.7717/peerj.438 (PMC4060027; doi:10.7717/peerj.438)
Supplement: Table S2 — Individual data for measurements of pigmentation in all four wings of 905 male specimens of Calopteryx maculata. See Table S1 for locations of sites. Wing damage is rated on a four-point scale: 1 = undamaged, 2 = slight damage, 3 = very damaged, 4 = not usable. [file peerj-02-438-s002.xlsx]

## Sheet: Table S2
	Table S2 - Individual data for measurements of pigmentation in all four wings of 905 male specimens
	of Calopteryx maculata. See Table S1 for locations of sites. Wing damage is rated on a four-point
	scale: 1=undamaged, 2=slight damage, 3=very damaged, 4=not usable.
	Country	Region	Site	Specimen	Wing	Mean	SD	Wing damage
	Canada	Ontario	Blakeney Falls	CL_B01	Hind_left	54.892	27.84	1
	Canada	Ontario	Blakeney Falls	CL_B01	Fore_left	53.232	21.75	1
	Canada	Ontario	Blakeney Falls	CL_B01	Fore_right	53.144	23.585	1
	Canada	Ontario	Blakeney Falls	CL_B01	Hind_right	54.175	28.831	1
	Canada	Ontario	Blakeney Falls	CL_B02	Hind_left	47.628	29.876	1
	Canada	Ontario	Blakeney Falls	CL_B02	Fore_left	42.492	17.802	1
	Canada	Ontario	Blakeney Falls	CL_B02	Hind_right	47.586	29.378	1
	Canada	Ontario	Blakeney Falls	CL_B02	Fore_right	42.411	17.333	1
	Canada	Ontario	Blakeney Falls	CL_B03	Hind_left	55.516	26.752	3
	Canada	Ontario	Blakeney Falls	CL_B03	Fore_left	52.043	18.699	1
	Canada	Ontario	Blakeney Falls	CL_B03	Hind_right	54.602	27.442	3
	Canada	Ontario	Blakeney Falls	CL_B03	Fore_right	51.3	17.985	1
	Canada	Ontario	Blakeney Falls	CL_B04	Hind_left	49.455	27.209	1
	Canada	Ontario	Blakeney Falls	CL_B04	Fore_left	49.269	19.391	2
	Canada	Ontario	Blakeney Falls	CL_B04	Hind_right	47.942	27.129	1
	Canada	Ontario	Blakeney Falls	CL_B04	Fore_right	49.22	19.455	2
	Canada	Ontario	Blakeney Falls	CL_B05	Fore_left	51.617	18.687	2
	Canada	Ontario	Blakeney Falls	CL_B05	Hind_left	52.396	24.045	1
	Canada	Ontario	Blakeney Falls	CL_B05	Hind_right	50.575	24.796	1
	Canada	Ontario	Blakeney Falls	CL_B05	Fore_right	51.212	18.137	2
	Canada	Ontario	Blakeney Falls	CL_B06	Fore_left	43.839	22.284	1
	Canada	Ontario	Blakeney Falls	CL_B06	Hind_left	47.051	31.777	1
	Canada	Ontario	Blakeney Falls	CL_B06	Fore_right	45.158	22.93	1
	Canada	Ontario	Blakeney Falls	CL_B06	Hind_right	47.069	31.137	1
	Canada	Ontario	Blakeney Falls	CL_B07	Hind_left	49.73	24.501	1
	Canada	Ontario	Blakeney Falls	CL_B07	Fore_left	50.165	16.408	1
	Canada	Ontario	Blakeney Falls	CL_B07	Hind_right	50.502	24.388	1
	Canada	Ontario	Blakeney Falls	CL_B07	Fore_right	50.132	16.314	1
	Canada	Ontario	Blakeney Falls	CL_B08	Hind_left	53.301	29.157	1
	Canada	Ontario	Blakeney Falls	CL_B08	Fore_left	48.953	19.103	1
	Canada	Ontario	Blakeney Falls	CL_B08	Hind_right	53.068	29.571	1
	Canada	Ontario	Blakeney Falls	CL_B08	Fore_right	50.387	19.743	1
	Canada	Ontario	Blakeney Falls	CL_B09	Hind_left	57.374	25.788	1
	Canada	Ontario	Blakeney Falls	CL_B09	Fore_left	59.812	20.251	2
	Canada	Ontario	Blakeney Falls	CL_B09	Hind_right	57.884	25.839	2
	Canada	Ontario	Blakeney Falls	CL_B09	Fore_right	59.297	19.88	2
	Canada	Ontario	Blakeney Falls	CL_B10	Fore_left	55.638	19.778	1
	Canada	Ontario	Blakeney Falls	CL_B10	Hind_left	58.03	23.97	1
	Canada	Ontario	Blakeney Falls	CL_B10	Fore_right	56.716	20.862	2
	Canada	Ontario	Blakeney Falls	CL_B10	Hind_right	60.281	26.766	2
	Canada	Ontario	Blakeney Falls	CL_B11	Hind_left	50.944	29.08	1
	Canada	Ontario	Blakeney Falls	CL_B11	Fore_left	49.629	20.028	1
	Canada	Ontario	Blakeney Falls	CL_B11	Hind_right	51.244	29.902	1
	Canada	Ontario	Blakeney Falls	CL_B11	Fore_right	49.923	20.932	2
	Canada	Ontario	Blakeney Falls	CL_B12	Fore_left	56.294	19.898	1
	Canada	Ontario	Blakeney Falls	CL_B12	Hind_left	56.65	26.906	1
	Canada	Ontario	Blakeney Falls	CL_B12	Fore_right	58.496	19.505	1
	Canada	Ontario	Blakeney Falls	CL_B12	Hind_right	58.063	26.433	1
	Canada	Ontario	Blakeney Falls	CL_B13	Hind_left	49.72	31.252	1
	Canada	Ontario	Blakeney Falls	CL_B13	Fore_left	49.206	20.838	1
	Canada	Ontario	Blakeney Falls	CL_B13	Hind_right	49.795	30.794	1
	Canada	Ontario	Blakeney Falls	CL_B13	Fore_right	47.994	20.733	1
	Canada	Ontario	Blakeney Falls	CL_B14	Hind_left	60.924	31.989	4
	Canada	Ontario	Blakeney Falls	CL_B14	Hind_right	57.334	29.075	1
	Canada	Ontario	Blakeney Falls	CL_B14	Fore_left	60.002	20.445	1
	Canada	Ontario	Blakeney Falls	CL_B14	Fore_right	59.505	20.978	1
	Canada	Ontario	Blakeney Falls	CL_B15	Hind_left	45.817	27.105	1
	Canada	Ontario	Blakeney Falls	CL_B15	Fore_left	43.562	18.932	2
	Canada	Ontario	Blakeney Falls	CL_B15	Hind_right	46.976	27.676	3
	Canada	Ontario	Blakeney Falls	CL_B15	Fore_right	43.444	18.408	2
	Canada	Ontario	Blakeney Falls	CL_B16	Hind_left	45.969	24.257	1
	Canada	Ontario	Blakeney Falls	CL_B16	Fore_left	41.019	15.282	1
	Canada	Ontario	Blakeney Falls	CL_B16	Hind_right	45.309	23.604	1
	Canada	Ontario	Blakeney Falls	CL_B16	Fore_right	40.598	15.079	2
	Canada	Ontario	Blakeney Falls	CL_B17	Hind_left	55.307	28.258	1
	Canada	Ontario	Blakeney Falls	CL_B17	Fore_left	57.01	24.368	2
	Canada	Ontario	Blakeney Falls	CL_B17	Hind_right	55.461	28.053	1
	Canada	Ontario	Blakeney Falls	CL_B17	Fore_right	55.662	23.186	1
	Canada	Ontario	Blakeney Falls	CL_B18	Fore_left	125.277	24.206	1
	Canada	Ontario	Blakeney Falls	CL_B18	Hind_left	122.765	22.392	1
	Canada	Ontario	Blakeney Falls	CL_B18	Fore_right	125.689	23.944	2
	Canada	Ontario	Blakeney Falls	CL_B18	Hind_right	122.8	22.953	1
	Canada	Ontario	Blakeney Falls	CL_B19	Hind_left	73.046	28.724	1
	Canada	Ontario	Blakeney Falls	CL_B19	Fore_left	75.682	26.834	2
	Canada	Ontario	Blakeney Falls	CL_B19	Hind_right	72.773	29.474	1
	Canada	Ontario	Blakeney Falls	CL_B19	Fore_right	75.723	26.674	1
	Canada	Ontario	Blakeney Falls	CL_B20	Hind_left	44.644	24.554	1
	Canada	Ontario	Blakeney Falls	CL_B20	Fore_left	41.627	15.199	1
	Canada	Ontario	Blakeney Falls	CL_B20	Hind_right	44.839	24.68	1
	Canada	Ontario	Blakeney Falls	CL_B20	Fore_right	42.899	16.9	1
	Canada	Ontario	Blakeney Falls	CL_B21	Hind_left	58.754	23.474	1
	Canada	Ontario	Blakeney Falls	CL_B21	Fore_left	61.82	22.244	1
	Canada	Ontario	Blakeney Falls	CL_B21	Hind_right	54.764	27.339	1
	Canada	Ontario	Blakeney Falls	CL_B21	Fore_right	62.312	22.651	1
	Canada	Ontario	Blakeney Falls	CL_B22	Hind_left	53.949	29.325	1
	Canada	Ontario	Blakeney Falls	CL_B22	Fore_left	50.473	18.143	1
	Canada	Ontario	Blakeney Falls	CL_B22	Hind_right	54.384	28.858	1
	Canada	Ontario	Blakeney Falls	CL_B22	Fore_right	50.77	18.571	3
	Canada	Ontario	Blakeney Falls	CL_B23	Fore_left	76.114	34.726	4
	Canada	Ontario	Blakeney Falls	CL_B23	Hind_left	62.926	25.737	1
	Canada	Ontario	Blakeney Falls	CL_B23	Fore_right	66.93	27.088	1
	Canada	Ontario	Blakeney Falls	CL_B23	Hind_right	63.096	25.198	1
	Canada	Ontario	Dorset	SR_B01	Fore_left	38.107	13.716	1
	Canada	Ontario	Dorset	SR_B01	Hind_left	41.565	20.248	1
	Canada	Ontario	Dorset	SR_B01	Fore_right	38.219	13.418	1
	Canada	Ontario	Dorset	SR_B01	Hind_right	40.711	20.435	1
	Canada	Ontario	Dorset	SR_B02	Fore_left	40.575	14.487	2
	Canada	Ontario	Dorset	SR_B02	Fore_right	41.213	16.965	2
	Canada	Ontario	Dorset	SR_B02	Hind_left	44.516	18.253	2
	Canada	Ontario	Dorset	SR_B02	Hind_right	44	18.528	2
	Canada	Ontario	Dorset	SR_B03	Hind_left	41.801	20.519	2
	Canada	Ontario	Dorset	SR_B03	Hind_right	43.193	21.707	3
	Canada	Ontario	Dorset	SR_B03	Fore_left	37.176	16.191	2
	Canada	Ontario	Dorset	SR_B03	Fore_right	37.265	14.339	2
	Canada	Ontario	Dorset	SR_B04	Hind_left	51.731	19.654	1
	Canada	Ontario	Dorset	SR_B04	Fore_left	48.906	12.738	1
	Canada	Ontario	Dorset	SR_B04	Fore_right	48.038	12.725	1
	Canada	Ontario	Dorset	SR_B04	Hind_right	51.363	20.263	1
	Canada	Ontario	Dorset	SR_B05	Fore_left	39.179	15.156	3
	Canada	Ontario	Dorset	SR_B05	Fore_right	40.429	17.246	3
	Canada	Ontario	Dorset	SR_B05	Hind_left	42.866	18.95	3
	Canada	Ontario	Dorset	SR_B05	Hind_right	41.543	16.467	2
	Canada	Ontario	Dorset	SR_B06	Hind_left	51.193	22.154	2
	Canada	Ontario	Dorset	SR_B06	Hind_right	52.362	22.948	2
	Canada	Ontario	Dorset	SR_B06	Fore_left	43.159	15.183	3
	Canada	Ontario	Dorset	SR_B06	Fore_right	44.199	15.89	4
	Canada	Ontario	Dorset	SR_B07	Hind_left	51.747	23.934	4
	Canada	Ontario	Dorset	SR_B07	Fore_left	46.386	23.713	4
	Canada	Ontario	Dorset	SR_B07	Hind_right	48.368	21.585	3
	Canada	Ontario	Dorset	SR_B07	Fore_right	44.48	19.837	3
	Canada	Ontario	Heber Down	CL_L02	Hind_left	55.715	29.086	1
	Canada	Ontario	Heber Down	CL_L02	Fore_left	50.376	17.566	1
	Canada	Ontario	Heber Down	CL_L02	Hind_right	57.486	29.491	1
	Canada	Ontario	Heber Down	CL_L02	Fore_right	50.469	17.981	1
	Canada	Ontario	Heber Down	CL_L03	Hind_left	63.46	29.098	1
	Canada	Ontario	Heber Down	CL_L03	Fore_left	58.629	18.435	1
	Canada	Ontario	Heber Down	CL_L03	Hind_right	62.873	28.514	1
	Canada	Ontario	Heber Down	CL_L03	Fore_right	59.398	19.07	1
	Canada	Ontario	Heber Down	CL_L04	Hind_left	61.369	31.199	1
	Canada	Ontario	Heber Down	CL_L04	Fore_left	54.549	22.216	1
	Canada	Ontario	Heber Down	CL_L04	Hind_right	62.513	32.233	1
	Canada	Ontario	Heber Down	CL_L04	Fore_right	55.653	21.653	1
	Canada	Ontario	Heber Down	CL_L05	Fore_left	49.698	18.404	1
	Canada	Ontario	Heber Down	CL_L05	Hind_left	54.718	30.399	1
	Canada	Ontario	Heber Down	CL_L05	Fore_right	48.538	18.487	1
	Canada	Ontario	Heber Down	CL_L05	Hind_right	56.06	30.321	1
	Canada	Ontario	Heber Down	CL_L06	Hind_left	47.973	29.716	1
	Canada	Ontario	Heber Down	CL_L06	Fore_left	39.135	18.621	1
	Canada	Ontario	Heber Down	CL_L06	Hind_right	49.327	29.903	1
	Canada	Ontario	Heber Down	CL_L06	Fore_right	39.373	18.5	1
	Canada	Ontario	Heber Down	CL_L07	Hind_left	52.699	31.411	1
	Canada	Ontario	Heber Down	CL_L07	Fore_left	46.353	20.196	1
	Canada	Ontario	Heber Down	CL_L07	Fore_right	47.789	20.862	1
	Canada	Ontario	Heber Down	CL_L07	Hind_right	52.487	29.976	1
	Canada	Ontario	Heber Down	CL_L08	Hind_left	52.125	32.229	1
	Canada	Ontario	Heber Down	CL_L08	Hind_right	83.505	39.005	1
	Canada	Ontario	Heber Down	CL_L08	Fore_left	45.642	20.639	1
	Canada	Ontario	Heber Down	CL_L08	Fore_right	43.972	20.713	1
	Canada	Ontario	Heber Down	CL_L09	Hind_left	63.469	35.161	1
	Canada	Ontario	Heber Down	CL_L09	Fore_left	51.387	23.484	1
	Canada	Ontario	Heber Down	CL_L09	Hind_right	63.592	35.436	1
	Canada	Ontario	Heber Down	CL_L09	Fore_right	52.063	23.281	1
	Canada	Ontario	Heber Down	CL_L10	Hind_left	54.281	29.622	1
	Canada	Ontario	Heber Down	CL_L10	Fore_left	49.549	19.76	1
	Canada	Ontario	Heber Down	CL_L10	Hind_right	55.823	28.952	1
	Canada	Ontario	Heber Down	CL_L10	Fore_right	50.51	19.755	1
	Canada	Ontario	Heber Down	CL_L11	Hind_left	61.354	31.868	1
	Canada	Ontario	Heber Down	CL_L11	Fore_left	55.689	24.967	4
	Canada	Ontario	Heber Down	CL_L11	Hind_right	61.232	31.66	1
	Canada	Ontario	Heber Down	CL_L11	Fore_right	53.519	22.129	1
	Canada	Ontario	Heber Down	CL_L12	Hind_left	49.871	31.52	3
	Canada	Ontario	Heber Down	CL_L12	Fore_left	41.374	19.364	1
	Canada	Ontario	Heber Down	CL_L12	Hind_right	50.72	30.484	1
	Canada	Ontario	Heber Down	CL_L12	Fore_right	42.273	19.193	1
	Canada	Ontario	Heber Down	CL_L13	Hind_left	76.853	30.499	1
	Canada	Ontario	Heber Down	CL_L13	Fore_left	73.34	22.855	1
	Canada	Ontario	Heber Down	CL_L13	Hind_right	74.347	30.121	1
	Canada	Ontario	Heber Down	CL_L13	Fore_right	74.456	23.894	1
	Canada	Ontario	Heber Down	CL_L14	Hind_left	48.439	31.919	1
	Canada	Ontario	Heber Down	CL_L14	Fore_left	38.539	19.376	1
	Canada	Ontario	Heber Down	CL_L14	Hind_right	47.917	31.124	1
	Canada	Ontario	Heber Down	CL_L14	Fore_right	39.817	18.802	1
	Canada	Ontario	Heber Down	CL_L15	Hind_left	54.326	33.19	1
	Canada	Ontario	Heber Down	CL_L15	Hind_right	54.633	33.128	1
	Canada	Ontario	Heber Down	CL_L15	Fore_left	43.522	19.901	1
	Canada	Ontario	Heber Down	CL_L15	Fore_right	42.963	20.348	1
	Canada	Ontario	Heber Down	CL_L16	Hind_left	62.04	32.757	1
	Canada	Ontario	Heber Down	CL_L16	Fore_left	53.726	22.234	1
	Canada	Ontario	Heber Down	CL_L16	Hind_right	61.331	31.805	1
	Canada	Ontario	Heber Down	CL_L16	Fore_right	52.438	21.825	1
	Canada	Ontario	Heber Down	CL_L17	Fore_left	45.249	23.496	1
	Canada	Ontario	Heber Down	CL_L17	Hind_left	55.46	34.19	1
	Canada	Ontario	Heber Down	CL_L17	Hind_right	55.06	34.122	1
	Canada	Ontario	Heber Down	CL_L17	Fore_right	45.712	24.24	1
	Canada	Ontario	Heber Down	CL_L19	Hind_left	49.083	32.626	1
	Canada	Ontario	Heber Down	CL_L19	Fore_left	40.414	20.998	1
	Canada	Ontario	Heber Down	CL_L19	Hind_right	49.226	32.203	1
	Canada	Ontario	Heber Down	CL_L19	Fore_right	39.915	20.06	1
	Canada	Ontario	Heber Down	CL_L20	Fore_left	49.415	23.201	1
	Canada	Ontario	Heber Down	CL_L20	Hind_left	59.486	34.246	1
	Canada	Ontario	Heber Down	CL_L20	Fore_right	48.843	23.88	1
	Canada	Ontario	Heber Down	CL_L20	Hind_right	61.287	34.833	4
	Canada	Ontario	Heber Down	CL_L21	Hind_left	48.031	27.318	1
	Canada	Ontario	Heber Down	CL_L21	Hind_left	49.524	31.974	1
	Canada	Ontario	Heber Down	CL_L21	Fore_left	39.32	15.661	2
	Canada	Ontario	Heber Down	CL_L21	Hind_right	55.782	36.439	1
	Canada	Ontario	Heber Down	CL_L21	Fore_right	39.742	15.526	2
	Canada	Ontario	Heber Down	CL_L22	Fore_left	41.169	18.576	1
	Canada	Ontario	Heber Down	CL_L22	Hind_right	48.445	31.45	1
	Canada	Ontario	Heber Down	CL_L22	Fore_right	41.599	18.486	1
	Canada	Ontario	Lucknow	SR_A01	Fore_left	51.38	15.678	1
	Canada	Ontario	Lucknow	SR_A01	Hind_left	55.295	28.28	1
	Canada	Ontario	Lucknow	SR_A01	Fore_right	51.393	16.403	1
	Canada	Ontario	Lucknow	SR_A01	Hind_right	56.972	30.133	1
	Canada	Ontario	Lucknow	SR_A02	Fore_left	42.188	15.741	2
	Canada	Ontario	Lucknow	SR_A02	Fore_right	42.477	14.847	1
	Canada	Ontario	Lucknow	SR_A02	Hind_left	49.444	23.9	1
	Canada	Ontario	Lucknow	SR_A02	Hind_right	49.074	24.208	1
	Canada	Ontario	Lucknow	SR_A03	Fore_left	103.734	40.087	1
	Canada	Ontario	Lucknow	SR_A03	Hind_left	50.695	26.673	1
	Canada	Ontario	Lucknow	SR_A03	Fore_right	103.465	38.025	1
	Canada	Ontario	Lucknow	SR_A03	Hind_right	51.934	27.544	1
	Canada	Ontario	Lucknow	SR_A04	Fore_left	60.529	15.174	1
	Canada	Ontario	Lucknow	SR_A04	Hind_left	62.686	25.45	1
	Canada	Ontario	Lucknow	SR_A04	Fore_right	61.381	15.517	1
	Canada	Ontario	Lucknow	SR_A04	Hind_right	62.531	25.504	1
	Canada	Ontario	Lucknow	SR_A05	Hind_left	51.479	27.688	4
	Canada	Ontario	Lucknow	SR_A05	Fore_left	40.936	14.011	2
	Canada	Ontario	Lucknow	SR_A05	Fore_right	41.376	15.035	1
	Canada	Ontario	Lucknow	SR_A05	Hind_right	53.479	27.041	4
	Canada	Ontario	Lucknow	SR_A06	Fore_left	45.232	14.808	1
	Canada	Ontario	Lucknow	SR_A06	Hind_left	54.918	24.762	1
	Canada	Ontario	Lucknow	SR_A06	Fore_right	45.398	14.098	1
	Canada	Ontario	Lucknow	SR_A06	Hind_right	54.025	23.718	1
	Canada	Ontario	Lucknow	SR_A07	Hind_left	53.624	27.391	1
	Canada	Ontario	Lucknow	SR_A07	Hind_right	55.005	25.858	1
	Canada	Ontario	Lucknow	SR_A07	Fore_left	44.838	15.633	1
	Canada	Ontario	Lucknow	SR_A07	Fore_right	45.909	16.367	1
	Canada	Ontario	Lucknow	SR_A08	Fore_left	52.951	20.141	1
	Canada	Ontario	Lucknow	SR_A08	Hind_left	58.147	29.473	1
	Canada	Ontario	Lucknow	SR_A08	Fore_right	53.622	19.715	1
	Canada	Ontario	Lucknow	SR_A08	Hind_right	57.838	30.71	1
	Canada	Ontario	Lucknow	SR_A09	Hind_left	45.869	21.799	1
	Canada	Ontario	Lucknow	SR_A09	Fore_left	37.785	14.386	1
	Canada	Ontario	Lucknow	SR_A09	Fore_right	38.134	14.168	1
	Canada	Ontario	Lucknow	SR_A09	Hind_right	45.233	21.796	1
	Canada	Ontario	Lucknow	SR_A10	Fore_left	40.407	14.414	2
	Canada	Ontario	Lucknow	SR_A10	Hind_left	44.485	20.887	2
	Canada	Ontario	Lucknow	SR_A10	Fore_right	39.722	14.376	2
	Canada	Ontario	Lucknow	SR_A10	Hind_right	43.802	20.457	2
	Canada	Ontario	Lucknow	SR_A11	Fore_left	44.9	16.17	2
	Canada	Ontario	Lucknow	SR_A11	Hind_left	53.006	27.261	2
	Canada	Ontario	Lucknow	SR_A11	Fore_right	44.64	15.826	3
	Canada	Ontario	Lucknow	SR_A11	Hind_right	53.321	27.005	2
	Canada	Ontario	Lucknow	SR_A12	Fore_left	59.225	22.091	2
	Canada	Ontario	Lucknow	SR_A12	Hind_left	66.658	33.786	2
	Canada	Ontario	Lucknow	SR_A12	Fore_right	59.079	22.022	2
	Canada	Ontario	Lucknow	SR_A12	Hind_right	66.396	33.177	2
	Canada	Ontario	Lucknow	SR_A13	Hind_left	49.015	23.488	1
	Canada	Ontario	Lucknow	SR_A13	Fore_left	43.442	19.946	4
	Canada	Ontario	Lucknow	SR_A13	Fore_right	50.286	30.13	4
	Canada	Ontario	Lucknow	SR_A13	Hind_right	48.7	23.618	2
	Canada	Ontario	Lucknow	SR_A14	Hind_left	66.776	32.243	1
	Canada	Ontario	Lucknow	SR_A14	Hind_right	66.311	31.738	1
	Canada	Ontario	Lucknow	SR_A14	Fore_left	66.859	20.138	1
	Canada	Ontario	Lucknow	SR_A14	Fore_right	68.629	19.535	1
	Canada	Ontario	Lucknow	SR_A15	Fore_left	39.813	13.952	1
	Canada	Ontario	Lucknow	SR_A15	Fore_right	38.935	13.789	1
	Canada	Ontario	Lucknow	SR_A15	Hind_left	46.845	23.031	1
	Canada	Ontario	Lucknow	SR_A15	Hind_right	47.492	24.361	1
	Canada	Ontario	Lucknow	SR_A16	Fore_left	43.337	17.311	2
	Canada	Ontario	Lucknow	SR_A16	Hind_left	51.148	29.572	1
	Canada	Ontario	Lucknow	SR_A16	Fore_right	42.958	17.381	1
	Canada	Ontario	Lucknow	SR_A16	Hind_right	51.65	28.107	1
	Canada	Ontario	Lucknow	SR_A17	Fore_left	49.967	17.279	1
	Canada	Ontario	Lucknow	SR_A17	Hind_left	55.523	28.737	1
	Canada	Ontario	Lucknow	SR_A17	Hind_right	53.461	29.209	1
	Canada	Ontario	Lucknow	SR_A17	Fore_right	51.369	18.062	1
	Canada	Ontario	Lucknow	SR_A18	Hind_left	48.79	27.089	1
	Canada	Ontario	Lucknow	SR_A18	Fore_left	39.779	13.994	1
	Canada	Ontario	Lucknow	SR_A18	Fore_right	40.027	14.162	1
	Canada	Ontario	Lucknow	SR_A18	Hind_right	48.16	26.842	1
	Canada	Ontario	Lucknow	SR_A19	Hind_left	47.444	21.283	1
	Canada	Ontario	Lucknow	SR_A19	Fore_left	42.993	15.845	1
	Canada	Ontario	Lucknow	SR_A19	Fore_right	43.177	15.183	1
	Canada	Ontario	Lucknow	SR_A19	Hind_right	48.75	21.948	1
	Canada	Ontario	Lucknow	SR_A20	Hind_left	50.794	29.724	2
	Canada	Ontario	Lucknow	SR_A20	Fore_left	40.695	16.363	1
	Canada	Ontario	Lucknow	SR_A20	Hind_right	49.553	28.898	1
	Canada	Ontario	Lucknow	SR_A20	Fore_right	46.497	25.779	3
	Canada	Ontario	North Bay	CH_A01	Hind_left	38.436	19.99	1
	Canada	Ontario	North Bay	CH_A01	Fore_left	33.615	12.847	1
	Canada	Ontario	North Bay	CH_A01	Fore_right	33.384	12.236	1
	Canada	Ontario	North Bay	CH_A01	Hind_right	39.017	20.493	1
	Canada	Ontario	North Bay	CH_A02	Hind_left	41.14	19.507	1
	Canada	Ontario	North Bay	CH_A02	Fore_left	36.52	13.212	1
	Canada	Ontario	North Bay	CH_A02	Fore_right	36.607	12.765	1
	Canada	Ontario	North Bay	CH_A02	Hind_right	42.441	20.342	1
	Canada	Ontario	North Bay	CH_A03	Fore_left	34.161	12.461	1
	Canada	Ontario	North Bay	CH_A03	Hind_left	37.42	17.182	4
	Canada	Ontario	North Bay	CH_A03	Hind_right	39.136	18.344	1
	Canada	Ontario	North Bay	CH_A03	Fore_right	34.889	12.819	1
	Canada	Ontario	North Bay	CH_A04	Hind_left	45.89	20.51	1
	Canada	Ontario	North Bay	CH_A04	Fore_left	38.026	11.828	1
	Canada	Ontario	North Bay	CH_A04	Hind_right	45.376	19.735	1
	Canada	Ontario	North Bay	CH_A04	Fore_right	38.946	12.247	1
	Canada	Ontario	North Bay	CH_A05	Hind_left	35.673	12.037	4
	Canada	Ontario	North Bay	CH_A05	Hind_right	39.089	18.762	1
	Canada	Ontario	North Bay	CH_A05	Fore_left	34.937	12.701	1
	Canada	Ontario	North Bay	CH_A05	Fore_right	35.54	12.471	1
	Canada	Ontario	North Bay	CH_A06	Hind_left	39.781	18.018	1
	Canada	Ontario	North Bay	CH_A06	Fore_left	35.069	12.246	1
	Canada	Ontario	North Bay	CH_A06	Fore_right	34.459	11.956	1
	Canada	Ontario	North Bay	CH_A06	Hind_right	39.914	17.758	1
	Canada	Ontario	North Bay	CH_A07	Hind_left	35.947	21.846	1
	Canada	Ontario	North Bay	CH_A07	Fore_left	29.91	12.66	1
	Canada	Ontario	North Bay	CH_A07	Hind_right	35.485	21.632	1
	Canada	Ontario	North Bay	CH_A07	Fore_right	30.004	13.001	1
	Canada	Ontario	North Bay	CH_A08	Hind_left	40.691	22.458	1
	Canada	Ontario	North Bay	CH_A08	Fore_left	33.572	12.682	4
	Canada	Ontario	North Bay	CH_A08	Fore_right	33.521	12.804	1
	Canada	Ontario	North Bay	CH_A08	Hind_right	40.887	22.141	1
	Canada	Ontario	North Bay	CH_A09	Hind_left	38.109	16.732	1
	Canada	Ontario	North Bay	CH_A09	Fore_left	33.84	11.796	1
	Canada	Ontario	North Bay	CH_A09	Fore_right	33.976	12.416	1
	Canada	Ontario	North Bay	CH_A09	Hind_right	37.713	16.199	1
	Canada	Ontario	North Bay	CH_A10	Hind_left	40.57	17.51	2
	Canada	Ontario	North Bay	CH_A10	Fore_left	38.325	12.381	1
	Canada	Ontario	North Bay	CH_A10	Hind_right	39.706	16.159	1
	Canada	Ontario	North Bay	CH_A10	Fore_right	38.754	12.229	1
	Canada	Ontario	North Bay	CH_A11	Fore_left	36.279	11.691	1
	Canada	Ontario	North Bay	CH_A11	Hind_left	42.718	17.192	1
	Canada	Ontario	North Bay	CH_A11	Hind_right	41.503	16.912	1
	Canada	Ontario	North Bay	CH_A11	Fore_right	36.175	11.835	1
	Canada	Ontario	North Bay	CH_A12	Fore_left	36.513	12.402	1
	Canada	Ontario	North Bay	CH_A12	Hind_left	43.193	18.923	1
	Canada	Ontario	North Bay	CH_A12	Hind_right	43.09	19.225	1
	Canada	Ontario	North Bay	CH_A12	Fore_right	36.241	12.835	1
	Canada	Ontario	North Bay	CH_A13	Fore_left	34.708	12.423	1
	Canada	Ontario	North Bay	CH_A13	Hind_left	40.294	19.701	1
	Canada	Ontario	North Bay	CH_A13	Fore_right	35.595	12.076	1
	Canada	Ontario	North Bay	CH_A13	Hind_right	40.881	19.706	1
	Canada	Ontario	North Bay	CH_A14	Hind_left	40.159	17.137	1
	Canada	Ontario	North Bay	CH_A14	Fore_left	35.537	11.807	1
	Canada	Ontario	North Bay	CH_A14	Hind_right	39.859	16.37	1
	Canada	Ontario	North Bay	CH_A14	Fore_right	36.319	12.423	1
	Canada	Ontario	North Bay	CH_A15	Hind_left	47.029	21.341	1
	Canada	Ontario	North Bay	CH_A15	Fore_left	44.427	13.689	1
	Canada	Ontario	North Bay	CH_A15	Hind_right	49.921	21.842	1
	Canada	Ontario	North Bay	CH_A15	Fore_right	45.381	14.713	1
	Canada	Ontario	North Bay	CH_A16	Hind_left	37.74	18.813	1
	Canada	Ontario	North Bay	CH_A16	Fore_left	34.024	17.716	3
	Canada	Ontario	North Bay	CH_A16	Hind_right	37.835	19.3	1
	Canada	Ontario	North Bay	CH_A16	Fore_right	33.016	11.764	1
	Canada	Ontario	North Bay	CH_A17	Fore_left	33.82	12.205	1
	Canada	Ontario	North Bay	CH_A17	Hind_left	40.656	20.314	1
	Canada	Ontario	North Bay	CH_A17	Hind_right	41.413	20.357	1
	Canada	Ontario	North Bay	CH_A17	Fore_right	35.106	13.312	1
	Canada	Ontario	North Bay	CH_A18	Fore_left	34.053	13.498	1
	Canada	Ontario	North Bay	CH_A18	Hind_left	39.625	17.156	1
	Canada	Ontario	North Bay	CH_A18	Fore_right	33.784	11.927	1
	Canada	Ontario	North Bay	CH_A18	Hind_right	40.356	17.412	1
	Canada	Ontario	North Bay	CH_A19	Hind_left	42.263	23.039	1
	Canada	Ontario	North Bay	CH_A19	Fore_left	34.952	14.216	1
	Canada	Ontario	North Bay	CH_A19	Fore_right	33.669	13.112	1
	Canada	Ontario	North Bay	CH_A19	Hind_right	37.376	18.901	1
	Canada	Ontario	North Bay	CH_A20	Hind_left	39.093	19.117	1
	Canada	Ontario	North Bay	CH_A20	Fore_left	34.264	12.639	1
	Canada	Ontario	North Bay	CH_A20	Hind_right	40.196	16.219	1
	Canada	Ontario	North Bay	CH_A20	Fore_right	34.595	13.176	1
	Canada	Ontario	North Bay	CH_A21	Fore_left	33.053	11.73	1
	Canada	Ontario	North Bay	CH_A21	Hind_left	36.921	17.286	1
	Canada	Ontario	North Bay	CH_A21	Hind_right	38.322	17.693	1
	Canada	Ontario	North Bay	CH_A21	Fore_right	32.758	11.735	1
	Canada	Ontario	North Bay	CH_A22	Hind_left	39.309	16.58	1
	Canada	Ontario	North Bay	CH_A22	Fore_left	34.706	12.038	1
	Canada	Ontario	North Bay	CH_A22	Fore_right	34.219	11.536	1
	Canada	Ontario	North Bay	CH_A22	Hind_right	38.69	16.746	2
	Canada	Ontario	North Bay	CH_A23	Fore_left	38.725	13.059	1
	Canada	Ontario	North Bay	CH_A23	Fore_right	39.449	13.599	1
	Canada	Ontario	North Bay	CH_A23	Hind_left	43.494	20.292	1
	Canada	Ontario	North Bay	CH_A23	Fore_left	36.643	12.917	1
	Canada	Ontario	North Bay	CH_A24	Fore_left	35.256	12.676	1
	Canada	Ontario	North Bay	CH_A24	Hind_left	39.275	18.055	1
	Canada	Ontario	North Bay	CH_A24	Fore_right	35.066	12.593	1
	Canada	Ontario	North Bay	CH_A24	Hind_right	39.904	19.312	1
	Canada	Ontario	North Bay	CH_A25	Fore_left	32.261	11.43	1
	Canada	Ontario	North Bay	CH_A25	Hind_left	37.287	18.222	1
	Canada	Ontario	North Bay	CH_A25	Fore_right	32.568	11.246	1
	Canada	Ontario	North Bay	CH_A25	Hind_right	39.462	19.779	1
	Canada	Ontario	North Bay	CH_A26	Hind_left	37.708	15.738	1
	Canada	Ontario	North Bay	CH_A26	Fore_left	34.465	11.933	1
	Canada	Ontario	North Bay	CH_A26	Fore_right	34.394	11.467	1
	Canada	Ontario	North Bay	CH_A26	Hind_right	38.19	15.602	1
	Canada	Ontario	North Bay	CH_A27	Fore_left	33.709	11.643	1
	Canada	Ontario	North Bay	CH_A27	Hind_left	39.163	21.331	1
	Canada	Ontario	North Bay	CH_A27	Fore_right	33.961	11.633	1
	Canada	Ontario	North Bay	CH_A27	Hind_right	38.901	20.825	1
	Canada	Ontario	North Bay	CH_A28	Hind_left	43.033	20.999	1
	Canada	Ontario	North Bay	CH_A28	Fore_left	37.33	13.177	1
	Canada	Ontario	North Bay	CH_A28	Hind_right	43.224	21.599	1
	Canada	Ontario	North Bay	CH_A28	Fore_right	37.295	13.193	1
	Canada	Ontario	North Bay	CH_A29	Fore_left	37.768	13.856	2
	Canada	Ontario	North Bay	CH_A29	Hind_left	40.749	17.289	1
	Canada	Ontario	North Bay	CH_A29	Hind_right	41.175	16.566	1
	Canada	Ontario	North Bay	CH_A29	Fore_right	38.754	15.418	3
	Canada	Ontario	North Bay	CH_A30	Hind_left	40.239	15.36	1
	Canada	Ontario	North Bay	CH_A30	Fore_left	37.159	12.246	1
	Canada	Ontario	North Bay	CH_A30	Hind_right	40.952	15.004	1
	Canada	Ontario	North Bay	CH_A30	Fore_right	37.317	11.645	1
	Canada	Ontario	North Bay	CH_A31	Hind_left	40.232	22.25	1
	Canada	Ontario	North Bay	CH_A31	Fore_left	34.149	13.521	1
	Canada	Ontario	North Bay	CH_A31	Fore_right	34.243	13.29	1
	Canada	Ontario	North Bay	CH_A31	Hind_right	40.495	21.914	2
	Canada	Ontario	North Bay	CH_A32	Fore_left	36.103	12.303	1
	Canada	Ontario	North Bay	CH_A32	Hind_left	41.688	19.382	1
	Canada	Ontario	North Bay	CH_A32	Fore_right	34.714	11.916	1
	Canada	Ontario	North Bay	CH_A32	Hind_right	39.637	18.97	1
	Canada	Ontario	North Bay	CH_A33	Hind_left	38.974	18.398	1
	Canada	Ontario	North Bay	CH_A33	Fore_left	33.489	12.556	1
	Canada	Ontario	North Bay	CH_A33	Fore_right	33.625	12.02	1
	Canada	Ontario	North Bay	CH_A33	Hind_right	39.952	18.948	1
	Canada	Ontario	North Bay	CH_B01	Fore_left	32.915	12.171	1
	Canada	Ontario	North Bay	CH_B01	Hind_left	36.2	18.223	1
	Canada	Ontario	North Bay	CH_B01	Fore_right	32.734	12.869	1
	Canada	Ontario	North Bay	CH_B01	Hind_right	36.136	18.088	1
	Canada	Ontario	North Bay	CH_B02	Hind_left	48.274	28.983	4
	Canada	Ontario	North Bay	CH_B02	Fore_left	35.049	15.209	4
	Canada	Ontario	North Bay	CH_B02	Hind_right	39.501	21.317	2
	Canada	Ontario	North Bay	CH_B02	Fore_right	35.637	19.069	4
	Canada	Ontario	North Bay	CH_B03	Hind_left	39.374	19.503	1
	Canada	Ontario	North Bay	CH_B03	Fore_left	33.834	11.8	1
	Canada	Ontario	North Bay	CH_B03	Hind_right	39.097	18.951	1
	Canada	Ontario	North Bay	CH_B03	Fore_right	33.858	11.791	1
	Canada	Ontario	North Bay	CH_B04	Fore_left	33.134	12.367	1
	Canada	Ontario	North Bay	CH_B04	Hind_left	35.536	14.832	1
	Canada	Ontario	North Bay	CH_B04	Fore_right	32.788	12.251	1
	Canada	Ontario	North Bay	CH_B04	Hind_right	35.826	14.26	1
	Canada	Ontario	North Bay	CH_B05	Fore_left	33.407	12.264	1
	Canada	Ontario	North Bay	CH_B05	Hind_left	37.48	16.599	1
	Canada	Ontario	North Bay	CH_B05	Fore_right	33.746	11.928	1
	Canada	Ontario	North Bay	CH_B05	Hind_right	38.407	16.724	1
	Canada	Ontario	North Bay	CH_B06	Hind_left	41.477	19.59	1
	Canada	Ontario	North Bay	CH_B06	Fore_left	35.207	12.751	1
	Canada	Ontario	North Bay	CH_B06	Hind_right	41.135	19.428	1
	Canada	Ontario	North Bay	CH_B06	Fore_right	35.253	12.166	1
	Canada	Ontario	North Bay	CH_B07	Fore_left	33.72	12.65	1
	Canada	Ontario	North Bay	CH_B07	Hind_left	38.531	19.67	1
	Canada	Ontario	North Bay	CH_B07	Fore_right	34.193	14.237	1
	Canada	Ontario	North Bay	CH_B07	Hind_right	37.65	19.379	1
	Canada	Ontario	North Bay	CH_B08	Fore_left	33.666	13.16	1
	Canada	Ontario	North Bay	CH_B08	Hind_left	38.893	21.578	3
	Canada	Ontario	North Bay	CH_B08	Fore_right	33.751	13.371	1
	Canada	Ontario	North Bay	CH_B08	Hind_right	37.668	19.504	1
	Canada	Ontario	North Bay	CH_B09	Fore_left	34.196	13.141	1
	Canada	Ontario	North Bay	CH_B09	Hind_left	40.308	21.411	3
	Canada	Ontario	North Bay	CH_B09	Hind_right	40.255	21.04	1
	Canada	Ontario	North Bay	CH_B09	Fore_right	34.616	13.047	1
	Canada	Ontario	North Bay	CH_B10	Fore_left	36.015	12.581	3
	Canada	Ontario	North Bay	CH_B10	Hind_left	40.019	19.11	1
	Canada	Ontario	North Bay	CH_B10	Fore_right	36.086	12.412	1
	Canada	Ontario	North Bay	CH_B10	Hind_right	41.079	20.103	1
	Canada	Ontario	North Bay	CH_B11	Hind_left	39.773	19.167	1
	Canada	Ontario	North Bay	CH_B11	Fore_left	33.448	12.579	1
	Canada	Ontario	North Bay	CH_B11	Fore_right	33.543	12.653	1
	Canada	Ontario	North Bay	CH_B11	Hind_right	38.67	18.139	1
	Canada	Ontario	North Bay	CH_B12	Hind_left	56.358	18.511	1
	Canada	Ontario	North Bay	CH_B12	Fore_left	55.674	13.983	1
	Canada	Ontario	North Bay	CH_B12	Fore_right	54.734	13.269	1
	Canada	Ontario	North Bay	CH_B12	Hind_right	55.284	19.215	1
	Canada	Ontario	North Bay	CH_B13	Hind_left	37.27	18.707	1
	Canada	Ontario	North Bay	CH_B13	Fore_left	32.619	12.06	1
	Canada	Ontario	North Bay	CH_B13	Hind_right	37.912	19.331	1
	Canada	Ontario	North Bay	CH_B13	Fore_right	33.343	12.351	1
	Canada	Ontario	North Bay	CH_B14	Fore_left	33.831	12.041	1
	Canada	Ontario	North Bay	CH_B14	Hind_left	38.443	17.997	1
	Canada	Ontario	North Bay	CH_B14	Hind_right	39.32	18.456	1
	Canada	Ontario	North Bay	CH_B14	Fore_right	34.374	11.886	1
	Canada	Ontario	North Bay	CH_B15	Hind_left	41.997	20.41	1
	Canada	Ontario	North Bay	CH_B15	Fore_left	35.607	13.421	4
	Canada	Ontario	North Bay	CH_B15	Fore_right	35.312	12.647	1
	Canada	Ontario	North Bay	CH_B15	Hind_right	42.869	20.664	4
	Canada	Ontario	North Bay	CH_B16	Hind_left	34.207	18.417	1
	Canada	Ontario	North Bay	CH_B16	Fore_left	29.857	12.384	1
	Canada	Ontario	North Bay	CH_B16	Fore_right	30.047	13.236	1
	Canada	Ontario	North Bay	CH_B16	Hind_right	34.82	19.354	1
	Canada	Ontario	North Bay	CH_B17	Fore_left	32.354	12.87	1
	Canada	Ontario	North Bay	CH_B17	Hind_left	37.679	17.765	1
	Canada	Ontario	North Bay	CH_B17	Fore_right	32.124	12.169	1
	Canada	Ontario	North Bay	CH_B17	Hind_right	37.74	17.595	1
	Canada	Ontario	North Bay	CH_B18	Hind_left	44.528	17.908	1
	Canada	Ontario	North Bay	CH_B18	Fore_left	39.47	12.71	1
	Canada	Ontario	North Bay	CH_B18	Hind_right	44.651	19.687	1
	Canada	Ontario	North Bay	CH_B18	Fore_right	40.099	13.263	1
	Canada	Ontario	North Bay	CH_B19	Fore_left	33.549	12.61	1
	Canada	Ontario	North Bay	CH_B19	Hind_left	38.842	20.319	1
	Canada	Ontario	North Bay	CH_B19	Fore_right	33.104	12.659	1
	Canada	Ontario	North Bay	CH_B19	Hind_right	38.838	20.403	1
	Canada	Ontario	North Bay	CH_B20	Fore_left	31.666	12.456	2
	Canada	Ontario	North Bay	CH_B20	Hind_left	35.759	16.751	1
	Canada	Ontario	North Bay	CH_B20	Fore_right	30.986	11.162	1
	Canada	Ontario	North Bay	CH_B20	Hind_right	35.892	16.763	1
	Canada	Ontario	North Bay	CH_B21	Hind_left	36.804	18.464	1
	Canada	Ontario	North Bay	CH_B21	Fore_left	32.581	11.59	1
	Canada	Ontario	North Bay	CH_B21	Hind_right	36.395	18.701	1
	Canada	Ontario	North Bay	CH_B21	Fore_right	33.069	12.403	1
	Canada	Ontario	North Bay	CH_B22	Hind_left	38.311	19.133	2
	Canada	Ontario	North Bay	CH_B22	Fore_left	34.357	13.494	1
	Canada	Ontario	North Bay	CH_B22	Hind_right	38.564	18.491	1
	Canada	Ontario	North Bay	CH_B22	Fore_right	34.177	13.475	1
	Canada	Ontario	North Bay	CH_B23	Fore_left	32.275	13.359	1
	Canada	Ontario	North Bay	CH_B23	Hind_left	35.614	17.427	1
	Canada	Ontario	North Bay	CH_B23	Hind_right	36.001	17.123	1
	Canada	Ontario	North Bay	CH_B23	Fore_right	32.241	12.656	1
	Canada	Ontario	North Bay	CH_B24	Hind_left	39.211	18.377	1
	Canada	Ontario	North Bay	CH_B24	Fore_left	33.092	11.74	1
	Canada	Ontario	North Bay	CH_B24	Fore_right	32.444	11.477	1
	Canada	Ontario	North Bay	CH_B24	Hind_right	38.151	17.465	1
	Canada	Ontario	North Bay	CH_B25	Hind_left	39.211	18.377	1
	Canada	Ontario	North Bay	CH_B25	Fore_left	33.092	11.74	1
	Canada	Ontario	North Bay	CH_B25	Fore_right	32.444	11.477	1
	Canada	Ontario	North Bay	CH_B25	Hind_right	38.151	17.465	1
	Canada	Ontario	North Bay	CH_B26	Fore_left	35.445	13.174	1
	Canada	Ontario	North Bay	CH_B26	Hind_left	40.837	21.828	1
	Canada	Ontario	North Bay	CH_B26	Fore_right	34.653	12.495	1
	Canada	Ontario	North Bay	CH_B26	Hind_right	39.652	20.787	1
	Canada	Ontario	North Bay	CH_B27	Fore_left	32.973	13.012	1
	Canada	Ontario	North Bay	CH_B27	Fore_right	33.287	13.373	1
	Canada	Ontario	North Bay	CH_B27	Hind_left	40.161	23.042	1
	Canada	Ontario	North Bay	CH_B27	Hind_right	39.387	22.648	1
	Canada	Ontario	North Bay	CH_B28	Fore_left	32.033	13.398	2
	Canada	Ontario	North Bay	CH_B28	Hind_left	35.815	15.922	1
	Canada	Ontario	North Bay	CH_B28	Hind_right	36.302	15.726	1
	Canada	Ontario	North Bay	CH_B28	Fore_right	32.083	11.882	2
	Canada	Ontario	North Bay	CH_B29	Fore_left	50.786	16.393	2
	Canada	Ontario	North Bay	CH_B29	Hind_left	54.196	24.882	1
	Canada	Ontario	North Bay	CH_B29	Fore_right	51.564	16.206	1
	Canada	Ontario	North Bay	CH_B29	Hind_right	55.343	26.463	3
	Canada	Ontario	North Bay	CH_B30	Hind_left	36.681	17.984	1
	Canada	Ontario	North Bay	CH_B30	Fore_left	31.643	11.284	1
	Canada	Ontario	North Bay	CH_B30	Hind_right	35.596	17.481	1
	Canada	Ontario	North Bay	CH_B30	Fore_right	32.105	11.952	1
	Canada	Ontario	North Bay	CH_B31	Fore_left	35.153	11.97	1
	Canada	Ontario	North Bay	CH_B31	Hind_left	39.56	18.06	1
	Canada	Ontario	North Bay	CH_B31	Fore_right	35.111	12.175	1
	Canada	Ontario	North Bay	CH_B31	Hind_right	39.149	17.763	1
	Canada	Ontario	North Bay	CH_C01	Hind_left	37.838	20.64	1
	Canada	Ontario	North Bay	CH_C01	Hind_right	37.586	20.367	1
	Canada	Ontario	North Bay	CH_C01	Fore_left	34.048	12.739	1
	Canada	Ontario	North Bay	CH_C01	Fore_right	33.959	12.811	1
	Canada	Ontario	North Bay	CH_C02	Hind_left	38.226	19.893	1
	Canada	Ontario	North Bay	CH_C02	Fore_left	34.17	14.967	2
	Canada	Ontario	North Bay	CH_C02	Hind_right	38.836	22.758	3
	Canada	Ontario	North Bay	CH_C02	Fore_right	34.24	13.704	2
	Canada	Ontario	North Bay	CH_C03	Fore_left	34.539	12.515	1
	Canada	Ontario	North Bay	CH_C03	Hind_left	40.014	22.426	1
	Canada	Ontario	North Bay	CH_C03	Fore_right	34.019	12.319	1
	Canada	Ontario	North Bay	CH_C03	Hind_right	39.043	21.838	1
	Canada	Ontario	North Bay	CH_C04	Fore_left	37.666	14.249	1
	Canada	Ontario	North Bay	CH_C04	Fore_right	37.222	14.526	2
	Canada	Ontario	North Bay	CH_C04	Hind_left	44.73	25.229	1
	Canada	Ontario	North Bay	CH_C04	Hind_right	45.194	25.945	1
	Canada	Ontario	North Bay	CH_C05	Hind_left	34.66	18.73	1
	Canada	Ontario	North Bay	CH_C05	Fore_left	29.481	12.393	1
	Canada	Ontario	North Bay	CH_C05	Hind_right	33.56	17.982	1
	Canada	Ontario	North Bay	CH_C05	Fore_right	29.741	12.208	1
	Canada	Ontario	North Bay	CH_C06	Fore_left	39.533	15.488	2
	Canada	Ontario	North Bay	CH_C06	Hind_left	42.692	22.852	1
	Canada	Ontario	North Bay	CH_C06	Hind_right	43.712	24.981	4
	Canada	Ontario	North Bay	CH_C06	Fore_right	38.7	14.715	2
	Canada	Ontario	North Bay	CH_C07	Fore_left	32.85	11.647	4
	Canada	Ontario	North Bay	CH_C07	Hind_left	37.313	19.523	1
	Canada	Ontario	North Bay	CH_C07	Hind_right	37.919	19.343	1
	Canada	Ontario	North Bay	CH_C07	Fore_right	34.099	12.436	1
	Canada	Ontario	North Bay	CH_C08	Hind_left	43.202	21.894	1
	Canada	Ontario	North Bay	CH_C08	Fore_left	39.186	14.133	1
	Canada	Ontario	North Bay	CH_C08	Hind_right	42.661	21.589	1
	Canada	Ontario	North Bay	CH_C08	Fore_right	38.36	14.263	1
	Canada	Ontario	North Bay	CH_C09	Fore_left	33.838	12.931	1
	Canada	Ontario	North Bay	CH_C09	Hind_left	37.901	16.552	2
	Canada	Ontario	North Bay	CH_C09	Hind_right	37.38	18.873	3
	Canada	Ontario	North Bay	CH_C09	Fore_right	33.194	12.406	1
	Canada	Ontario	North Bay	CH_C10	Fore_left	33.134	14.052	2
	Canada	Ontario	North Bay	CH_C10	Hind_left	36.228	18.586	1
	Canada	Ontario	North Bay	CH_C10	Fore_right	32.627	11.491	1
	Canada	Ontario	North Bay	CH_C10	Hind_right	37.485	18.594	2
	Canada	Ontario	North Bay	CH_C11	Hind_left	38.247	20.464	1
	Canada	Ontario	North Bay	CH_C11	Fore_left	33.749	14.708	2
	Canada	Ontario	North Bay	CH_C11	Fore_right	33.109	12.84	1
	Canada	Ontario	North Bay	CH_C11	Hind_right	36.413	18.779	1
	Canada	Ontario	North Bay	CH_C12	Hind_left	38.059	23.447	1
	Canada	Ontario	North Bay	CH_C12	Fore_left	31.955	13.294	1
	Canada	Ontario	North Bay	CH_C12	Hind_right	38.408	24.075	1
	Canada	Ontario	North Bay	CH_C12	Fore_right	32.259	13.691	1
	Canada	Ontario	North Bay	CH_C13	Fore_left	50.359	19.237	1
	Canada	Ontario	North Bay	CH_C13	Fore_right	43.342	15.831	1
	Canada	Ontario	North Bay	CH_C13	Hind_left	44.185	24.755	1
	Canada	Ontario	North Bay	CH_C13	Fore_left	41.798	13.085	1
	Canada	Ontario	North Bay	CH_C14	Fore_left	36.296	20.249	1
	Canada	Ontario	North Bay	CH_C14	Hind_left	39.022	23.053	1
	Canada	Ontario	North Bay	CH_C14	Hind_right	39.932	25.511	1
	Canada	Ontario	North Bay	CH_C14	Fore_right	34.452	15.111	1
	Canada	Ontario	North Bay	CH_C15	Fore_left	39.861	13.978	1
	Canada	Ontario	North Bay	CH_C15	Hind_left	42.661	22.138	1
	Canada	Ontario	North Bay	CH_C15	Hind_right	44.004	21.415	1
	Canada	Ontario	North Bay	CH_C15	Fore_right	39.393	13.334	1
	Canada	Ontario	North Bay	CH_C16	Hind_left	39.654	19.745	1
	Canada	Ontario	North Bay	CH_C16	Fore_left	35.491	13.121	1
	Canada	Ontario	North Bay	CH_C16	Hind_right	40.883	20.078	1
	Canada	Ontario	North Bay	CH_C16	Fore_right	35.343	12.84	1
	Canada	Ontario	North Bay	CH_C17	Fore_left	32.362	11.586	1
	Canada	Ontario	North Bay	CH_C17	Hind_left	37.462	18.414	1
	Canada	Ontario	North Bay	CH_C17	Fore_right	31.956	12.04	1
	Canada	Ontario	North Bay	CH_C17	Hind_right	37.359	19.17	1
	Canada	Ontario	North Bay	CH_C18	Hind_left	43.793	20.663	1
	Canada	Ontario	North Bay	CH_C18	Hind_right	44.212	21.285	1
	Canada	Ontario	North Bay	CH_C18	Fore_left	37.244	13.874	1
	Canada	Ontario	North Bay	CH_C18	Fore_right	37.522	13.667	1
	Canada	Ontario	North Bay	CH_C19	Fore_left	36.444	21.185	4
	Canada	Ontario	North Bay	CH_C19	Hind_left	38.693	19.96	1
	Canada	Ontario	North Bay	CH_C19	Fore_right	33.91	12.995	1
	Canada	Ontario	North Bay	CH_C19	Hind_right	39.251	20.221	2
	Canada	Ontario	North Bay	CH_C20	Hind_left	38.392	16.437	1
	Canada	Ontario	North Bay	CH_C20	Fore_left	34.381	12.613	1
	Canada	Ontario	North Bay	CH_C20	Hind_right	38.495	17.667	1
	Canada	Ontario	North Bay	CH_C20	Fore_right	35.122	12.512	1
	Canada	Ontario	Peterborough	CL_J01	Fore_left	46.682	19.136	1
	Canada	Ontario	Peterborough	CL_J01	Hind_left	55.499	31.467	1
	Canada	Ontario	Peterborough	CL_J01	Hind_right	53.658	30.901	1
	Canada	Ontario	Peterborough	CL_J01	Fore_right	46.664	19.144	1
	Canada	Ontario	Peterborough	CL_J02	Fore_left	40.356	16.573	1
	Canada	Ontario	Peterborough	CL_J02	Hind_left	47.423	29.358	1
	Canada	Ontario	Peterborough	CL_J02	Hind_right	49.04	31.001	3
	Canada	Ontario	Peterborough	CL_J02	Fore_right	40.267	16.841	1
	Canada	Ontario	Peterborough	CL_J03	Fore_left	61.302	19.34	2
	Canada	Ontario	Peterborough	CL_J03	Hind_left	65.227	28.908	1
	Canada	Ontario	Peterborough	CL_J03	Fore_right	61.86	18.907	1
	Canada	Ontario	Peterborough	CL_J03	Hind_right	65.347	28.594	2
	Canada	Ontario	Peterborough	CL_J04	Hind_left	47.979	21.605	1
	Canada	Ontario	Peterborough	CL_J04	Fore_left	42.603	15.214	4
	Canada	Ontario	Peterborough	CL_J04	Hind_right	47.38	21.574	1
	Canada	Ontario	Peterborough	CL_J04	Fore_right	41.309	13.423	1
	Canada	Ontario	Peterborough	CL_J05	Hind_left	44.22	26.204	2
	Canada	Ontario	Peterborough	CL_J05	Fore_left	37.711	16.983	2
	Canada	Ontario	Peterborough	CL_J05	Hind_right	42.46	24.789	1
	Canada	Ontario	Peterborough	CL_J05	Fore_right	37.877	16.712	2
	Canada	Ontario	Peterborough	CL_J06	Fore_left	42.781	18.623	2
	Canada	Ontario	Peterborough	CL_J06	Hind_left	51.969	30.958	1
	Canada	Ontario	Peterborough	CL_J06	Hind_right	51.859	32.698	3
	Canada	Ontario	Peterborough	CL_J06	Fore_right	42.961	18.118	1
	Canada	Ontario	Peterborough	CL_J07	Hind_left	49.843	29.713	1
	Canada	Ontario	Peterborough	CL_J07	Fore_left	40.107	15.539	1
	Canada	Ontario	Peterborough	CL_J07	Hind_right	49.404	29.489	1
	Canada	Ontario	Peterborough	CL_J07	Fore_right	40.701	16.173	1
	Canada	Ontario	Peterborough	CL_J08	Fore_left	43.801	17.489	2
	Canada	Ontario	Peterborough	CL_J08	Hind_left	49.707	30.982	2
	Canada	Ontario	Peterborough	CL_J08	Fore_right	45.788	17.854	1
	Canada	Ontario	Peterborough	CL_J08	Hind_right	52.26	33.267	4
	Canada	Ontario	Peterborough	CL_J09	Hind_left	70.194	28.87	1
	Canada	Ontario	Peterborough	CL_J09	Fore_left	69.842	19.745	1
	Canada	Ontario	Peterborough	CL_J09	Fore_right	71.171	19.629	1
	Canada	Ontario	Peterborough	CL_J09	Hind_right	70.294	29.453	3
	Canada	Ontario	Peterborough	CL_J10	Hind_left	49.702	29.799	1
	Canada	Ontario	Peterborough	CL_J10	Fore_left	42.402	18.06	1
	Canada	Ontario	Peterborough	CL_J10	Hind_right	49.62	30.973	2
	Canada	Ontario	Peterborough	CL_J10	Fore_right	42.706	18.223	2
	Canada	Ontario	Peterborough	CL_J11	Fore_left	41.514	16.193	1
	Canada	Ontario	Peterborough	CL_J11	Hind_left	46.528	26.11	1
	Canada	Ontario	Peterborough	CL_J11	Fore_right	41.485	16.107	2
	Canada	Ontario	Peterborough	CL_J11	Hind_right	47.665	26.92	2
	Canada	Ontario	Peterborough	CL_J12	Hind_left	70.359	30.371	1
	Canada	Ontario	Peterborough	CL_J12	Fore_left	66.453	19.806	1
	Canada	Ontario	Peterborough	CL_J12	Hind_right	69.921	30.356	1
	Canada	Ontario	Peterborough	CL_J12	Fore_right	65.116	19.628	1
	Canada	Ontario	Peterborough	CL_J13	Fore_left	40.701	18.994	1
	Canada	Ontario	Peterborough	CL_J13	Hind_left	45.887	29.163	1
	Canada	Ontario	Peterborough	CL_J13	Fore_right	40.08	18.177	1
	Canada	Ontario	Peterborough	CL_J13	Hind_right	46.065	28.364	1
	Canada	Ontario	Peterborough	CL_J14	Fore_left	39.375	15.006	1
	Canada	Ontario	Peterborough	CL_J14	Hind_left	45.333	23.727	1
	Canada	Ontario	Peterborough	CL_J14	Hind_right	44.942	23.515	2
	Canada	Ontario	Peterborough	CL_J14	Fore_right	39.517	15.361	2
	Canada	Ontario	Peterborough	CL_J15	Fore_left	37.741	15.479	1
	Canada	Ontario	Peterborough	CL_J15	Hind_left	47.62	27.457	1
	Canada	Ontario	Peterborough	CL_J15	Fore_right	38.805	17.186	2
	Canada	Ontario	Peterborough	CL_J15	Hind_right	47.016	26.781	1
	Canada	Ontario	Peterborough	CL_J16	Fore_left	68.195	20.303	1
	Canada	Ontario	Peterborough	CL_J16	Hind_left	71.675	28.517	1
	Canada	Ontario	Peterborough	CL_J16	Fore_right	66.655	20.778	1
	Canada	Ontario	Peterborough	CL_J16	Hind_right	72.419	30.184	2
	Canada	Ontario	Peterborough	CL_J17	Fore_left	42.823	17.532	1
	Canada	Ontario	Peterborough	CL_J17	Hind_left	50.791	30.764	1
	Canada	Ontario	Peterborough	CL_J17	Fore_right	43.619	17.714	1
	Canada	Ontario	Peterborough	CL_J17	Hind_right	50.537	31.416	1
	Canada	Ontario	Peterborough	CL_J18	Fore_left	56.086	18.75	1
	Canada	Ontario	Peterborough	CL_J18	Hind_left	62.077	30.797	1
	Canada	Ontario	Peterborough	CL_J18	Fore_right	57.122	19.556	1
	Canada	Ontario	Peterborough	CL_J18	Hind_right	61.6	30.283	1
	Canada	Ontario	Peterborough	CL_J19	Fore_left	51.89	17.839	2
	Canada	Ontario	Peterborough	CL_J19	Hind_left	56.218	30.045	2
	Canada	Ontario	Peterborough	CL_J19	Fore_right	52.678	17.871	1
	Canada	Ontario	Peterborough	CL_J19	Hind_right	55.873	30.096	1
	Canada	Ontario	Peterborough	CL_J20	Hind_left	44.986	26.422	1
	Canada	Ontario	Peterborough	CL_J20	Fore_left	36.457	14.662	1
	Canada	Ontario	Peterborough	CL_J20	Hind_right	45.398	26.093	1
	Canada	Ontario	Peterborough	CL_J20	Fore_right	38.323	14.812	1
	Canada	Ontario	Ridgetown	HL_A01	Hind_left	53.755	31.687	1
	Canada	Ontario	Ridgetown	HL_A01	Fore_left	41.142	15.061	4
	Canada	Ontario	Ridgetown	HL_A01	Hind_right	50.024	30.151	1
	Canada	Ontario	Ridgetown	HL_A01	Fore_right	43.301	19.53	1
	Canada	Ontario	Ridgetown	HL_A02	Hind_left	40.728	23.947	1
	Canada	Ontario	Ridgetown	HL_A02	Fore_left	35.307	14.896	1
	Canada	Ontario	Ridgetown	HL_A02	Hind_right	40.57	23.933	1
	Canada	Ontario	Ridgetown	HL_A02	Fore_right	35.994	15.816	1
	Canada	Ontario	Ridgetown	HL_A03	Fore_left	33.456	13.02	1
	Canada	Ontario	Ridgetown	HL_A03	Fore_right	32.392	12.247	1
	Canada	Ontario	Ridgetown	HL_A03	Hind_left	37.271	17.038	1
	Canada	Ontario	Ridgetown	HL_A03	Hind_right	36.79	17.35	1
	Canada	Ontario	Ridgetown	HL_A04	Fore_left	34.266	14.718	1
	Canada	Ontario	Ridgetown	HL_A04	Hind_left	40.771	23.905	1
	Canada	Ontario	Ridgetown	HL_A04	Hind_right	41.208	24.769	1
	Canada	Ontario	Ridgetown	HL_A04	Fore_right	35.93	16.703	1
	Canada	Ontario	Ridgetown	HL_A05	Hind_left	50.381	33.137	1
	Canada	Ontario	Ridgetown	HL_A05	Fore_left	45.209	19.297	1
	Canada	Ontario	Ridgetown	HL_A05	Fore_right	45.303	19.385	1
	Canada	Ontario	Ridgetown	HL_A05	Hind_right	49.619	32.558	1
	Canada	Ontario	Ridgetown	HL_A06	Hind_left	68.604	32.11	1
	Canada	Ontario	Ridgetown	HL_A06	Fore_left	63.298	20.582	1
	Canada	Ontario	Ridgetown	HL_A06	Hind_right	69.856	31.695	1
	Canada	Ontario	Ridgetown	HL_A06	Fore_right	63.854	21.531	1
	Canada	Ontario	Ridgetown	HL_A07	Hind_left	45.341	24.117	1
	Canada	Ontario	Ridgetown	HL_A07	Hind_right	44.95	25.381	1
	Canada	Ontario	Ridgetown	HL_A07	Fore_left	39.801	14.222	1
	Canada	Ontario	Ridgetown	HL_A07	Fore_right	39.93	15.625	2
	Canada	Ontario	Ridgetown	HL_A08	Fore_left	138.08	27.035	4
	Canada	Ontario	Ridgetown	HL_A08	Hind_left	133.136	26.45	4
	Canada	Ontario	Ridgetown	HL_A08	Hind_right	127.628	29.858	4
	Canada	Ontario	Ridgetown	HL_A08	Fore_right	137.654	26.225	1
	Canada	Ontario	Ridgetown	HL_A09	Hind_left	46.745	32.339	2
	Canada	Ontario	Ridgetown	HL_A09	Fore_left	35.98	15.714	1
	Canada	Ontario	Ridgetown	HL_A09	Fore_right	36.832	15.85	1
	Canada	Ontario	Ridgetown	HL_A09	Hind_right	44.83	30.483	1
	Canada	Ontario	Ridgetown	HL_A10	Fore_left	36.072	14.982	1
	Canada	Ontario	Ridgetown	HL_A10	Hind_left	43.455	23.782	1
	Canada	Ontario	Ridgetown	HL_A10	Hind_right	45.78	25.506	1
	Canada	Ontario	Ridgetown	HL_A10	Fore_right	36.416	14.318	1
	Canada	Ontario	Ridgetown	HL_A11	Fore_left	37.709	15.67	1
	Canada	Ontario	Ridgetown	HL_A11	Fore_right	39.039	16.423	2
	Canada	Ontario	Ridgetown	HL_A11	Hind_left	46.679	27.405	2
	Canada	Ontario	Ridgetown	HL_A11	Hind_right	46.505	27.022	1
	Canada	Ontario	Ridgetown	HL_A12	Fore_left	37.146	18.571	2
	Canada	Ontario	Ridgetown	HL_A12	Fore_right	36.024	17.32	2
	Canada	Ontario	Ridgetown	HL_A12	Hind_left	41.421	27.029	2
	Canada	Ontario	Ridgetown	HL_A12	Hind_right	42.935	27.432	2
	Canada	Ontario	Ridgetown	HL_A13	Hind_left	40.487	26.054	2
	Canada	Ontario	Ridgetown	HL_A13	Fore_left	34.322	16.226	2
	Canada	Ontario	Ridgetown	HL_A13	Fore_right	35.066	15.635	1
	Canada	Ontario	Ridgetown	HL_A13	Hind_right	40.007	25.725	1
	Canada	Ontario	Ridgetown	HL_A14	Hind_left	37.949	22.91	1
	Canada	Ontario	Ridgetown	HL_A14	Fore_left	32.56	13.357	2
	Canada	Ontario	Ridgetown	HL_A14	Hind_right	38.553	23.784	1
	Canada	Ontario	Ridgetown	HL_A14	Fore_right	32.766	13.4	1
	Canada	Ontario	Ridgetown	HL_A15	Hind_left	133.695	25.565	4
	Canada	Ontario	Ridgetown	HL_A15	Hind_right	131.884	25.367	1
	Canada	Ontario	Ridgetown	HL_A15	Fore_left	140.558	25.781	1
	Canada	Ontario	Ridgetown	HL_A15	Fore_right	140.791	25.36	4
	Canada	Ontario	Ridgetown	HL_A16	Hind_left	44.801	28.386	1
	Canada	Ontario	Ridgetown	HL_A16	Fore_left	36.735	16.678	1
	Canada	Ontario	Ridgetown	HL_A16	Hind_right	44.085	26.943	1
	Canada	Ontario	Ridgetown	HL_A16	Hind_left	44.219	27.256	1
	Canada	Ontario	Ridgetown	HL_A17	Fore_left	37.605	14.878	1
	Canada	Ontario	Ridgetown	HL_A17	Hind_left	45.709	29.695	1
	Canada	Ontario	Ridgetown	HL_A17	Fore_right	38.475	15.502	1
	Canada	Ontario	Ridgetown	HL_A17	Hind_right	45.858	28.498	4
	Canada	Ontario	Ridgetown	HL_A18	Hind_left	52.528	32.292	1
	Canada	Ontario	Ridgetown	HL_A18	Hind_right	51.73	31.564	1
	Canada	Ontario	Ridgetown	HL_A18	Fore_left	44.684	17.22	1
	Canada	Ontario	Ridgetown	HL_A18	Fore_right	42.624	16.92	1
	Canada	Ontario	Sault Ste Marie	CH_D01	Fore_left	37.178	13.112	1
	Canada	Ontario	Sault Ste Marie	CH_D01	Hind_left	42.878	19.812	1
	Canada	Ontario	Sault Ste Marie	CH_D01	Hind_right	42.712	20.304	1
	Canada	Ontario	Sault Ste Marie	CH_D01	Fore_right	38.675	14.08	4
	Canada	Ontario	Sault Ste Marie	CH_D02	Hind_left	40.214	17.159	1
	Canada	Ontario	Sault Ste Marie	CH_D02	Fore_left	35.179	12.652	1
	Canada	Ontario	Sault Ste Marie	CH_D02	Hind_right	40.196	16.905	1
	Canada	Ontario	Sault Ste Marie	CH_D02	Fore_right	35.45	12.836	1
	Canada	Ontario	Sault Ste Marie	CH_D03	Fore_left	41.478	12.857	4
	Canada	Ontario	Sault Ste Marie	CH_D03	Hind_left	43.47	14.669	1
	Canada	Ontario	Sault Ste Marie	CH_D03	Fore_right	41.371	12.278	1
	Canada	Ontario	Sault Ste Marie	CH_D03	Hind_right	43.78	14.361	1
	Canada	Ontario	Sault Ste Marie	CH_D04	Fore_left	36.878	13.593	1
	Canada	Ontario	Sault Ste Marie	CH_D04	Hind_left	38.89	14.395	1
	Canada	Ontario	Sault Ste Marie	CH_D04	Hind_right	38.94	14.916	1
	Canada	Ontario	Sault Ste Marie	CH_D04	Fore_right	36.415	12.645	1
	Canada	Ontario	Sault Ste Marie	CH_D05	Fore_left	35.06	12.706	1
	Canada	Ontario	Sault Ste Marie	CH_D05	Hind_left	45.372	23.902	1
	Canada	Ontario	Sault Ste Marie	CH_D05	Fore_right	34.984	12.652	1
	Canada	Ontario	Sault Ste Marie	CH_D05	Hind_right	42.226	20.635	3
	Canada	Ontario	Sault Ste Marie	CH_D06	Hind_left	38.897	15.427	1
	Canada	Ontario	Sault Ste Marie	CH_D06	Fore_left	35.609	12.165	1
	Canada	Ontario	Sault Ste Marie	CH_D06	Fore_right	37.748	17.722	4
	Canada	Ontario	Sault Ste Marie	CH_D06	Hind_right	39.77	15.392	1
	Canada	Ontario	Sault Ste Marie	CH_D07	Hind_left	36.333	18.028	1
	Canada	Ontario	Sault Ste Marie	CH_D07	Fore_left	32.644	12.507	1
	Canada	Ontario	Sault Ste Marie	CH_D07	Hind_right	36.642	18.345	1
	Canada	Ontario	Sault Ste Marie	CH_D07	Fore_right	33.183	12.806	1
	Canada	Ontario	Sault Ste Marie	CH_D08	Fore_left	35.266	12.323	1
	Canada	Ontario	Sault Ste Marie	CH_D08	Hind_left	40.21	15.474	1
	Canada	Ontario	Sault Ste Marie	CH_D08	Fore_right	35.183	12.322	1
	Canada	Ontario	Sault Ste Marie	CH_D08	Hind_right	39.929	15.322	1
	Canada	Ontario	Sault Ste Marie	CH_D09	Hind_left	42.763	16.188	4
	Canada	Ontario	Sault Ste Marie	CH_D09	Hind_right	42.511	15.766	4
	Canada	Ontario	Sault Ste Marie	CH_D09	Fore_left	39.413	13.824	2
	Canada	Ontario	Sault Ste Marie	CH_D09	Fore_right	39.557	12.597	1
	Canada	Ontario	Sault Ste Marie	CH_D10	Fore_left	36.421	12.567	1
	Canada	Ontario	Sault Ste Marie	CH_D10	h	42.53	20.679	1
	Canada	Ontario	Sault Ste Marie	CH_D10	Hind_right	41.208	20.828	1
	Canada	Ontario	Sault Ste Marie	CH_D10	Fore_right	36.971	12.644	1
	Canada	Ontario	Sault Ste Marie	CH_D11	Hind_left	37.449	15.467	1
	Canada	Ontario	Sault Ste Marie	CH_D11	Fore_left	33.978	11.932	1
	Canada	Ontario	Sault Ste Marie	CH_D11	Fore_right	34.275	12.375	1
	Canada	Ontario	Sault Ste Marie	CH_D11	Hind_right	38.735	18.038	2
	Canada	Ontario	Sault Ste Marie	CH_D12	Fore_left	38.502	12.393	1
	Canada	Ontario	Sault Ste Marie	CH_D12	Hind_left	42.813	16.481	4
	Canada	Ontario	Sault Ste Marie	CH_D12	Fore_right	38.487	12.019	1
	Canada	Ontario	Sault Ste Marie	CH_D12	Hind_right	42.224	15.351	1
	Canada	Ontario	Sault Ste Marie	CH_D13	Hind_left	40.563	17.629	1
	Canada	Ontario	Sault Ste Marie	CH_D13	Fore_left	37.493	13.551	1
	Canada	Ontario	Sault Ste Marie	CH_D13	Fore_right	36.853	13.31	1
	Canada	Ontario	Sault Ste Marie	CH_D13	Hind_right	40.847	16.763	1
	Canada	Ontario	Sault Ste Marie	CH_D14	Fore_left	35.031	11.244	1
	Canada	Ontario	Sault Ste Marie	CH_D14	Hind_left	36.916	15.067	1
	Canada	Ontario	Sault Ste Marie	CH_D14	Fore_right	34.135	11.478	1
	Canada	Ontario	Sault Ste Marie	CH_D14	Hind_right	36.841	14.224	1
	Canada	Ontario	Sault Ste Marie	CH_D15	Fore_left	37.294	13.168	1
	Canada	Ontario	Sault Ste Marie	CH_D15	Hind_left	44.664	19.333	4
	Canada	Ontario	Sault Ste Marie	CH_D15	Hind_right	41.602	17.079	1
	Canada	Ontario	Sault Ste Marie	CH_D15	Fore_right	37.409	12.337	1
	Canada	Ontario	Sault Ste Marie	CH_D16	Fore_left	40.382	13.765	1
	Canada	Ontario	Sault Ste Marie	CH_D16	Fore_right	39.502	12.147	1
	Canada	Ontario	Sault Ste Marie	CH_D16	Hind_left	45.17	18.574	4
	Canada	Ontario	Sault Ste Marie	CH_D16	Hind_right	44.684	17.707	1
	Canada	Ontario	Sault Ste Marie	CH_D17	Hind_left	44.095	21.371	1
	Canada	Ontario	Sault Ste Marie	CH_D17	Fore_left	40.816	13.048	1
	Canada	Ontario	Sault Ste Marie	CH_D17	Hind_right	43.594	21.062	1
	Canada	Ontario	Sault Ste Marie	CH_D17	Fore_right	40.553	12.723	1
	Canada	Ontario	Sault Ste Marie	CH_D20	Fore_left	38.244	12.698	1
	Canada	Ontario	Sault Ste Marie	CH_D20	Fore_right	38.047	13.507	1
	Canada	Ontario	Sault Ste Marie	CH_D20	Hind_left	42.704	15.143	1
	Canada	Ontario	Sault Ste Marie	CH_D20	Hind_right	42.947	15.578	2
	Canada	Ontario	Sault Ste Marie	CH_D21	Fore_left	39.984	13.506	1
	Canada	Ontario	Sault Ste Marie	CH_D21	Hind_left	44.023	15.944	1
	Canada	Ontario	Sault Ste Marie	CH_D21	Fore_right	39.285	13.559	1
	Canada	Ontario	Sault Ste Marie	CH_D21	Hind_right	43.679	16.319	1
	Canada	Ontario	Sault Ste Marie	CH_D22	Hind_left	40.448	17.736	1
	Canada	Ontario	Sault Ste Marie	CH_D22	Fore_left	35.043	13.205	3
	Canada	Ontario	Sault Ste Marie	CH_D22	Fore_right	34.479	12.135	1
	Canada	Ontario	Sault Ste Marie	CH_D22	Hind_right	39.45	16.196	1
	Canada	Ontario	Sault Ste Marie	CH_D23	Hind_left	44.443	18.186	1
	Canada	Ontario	Sault Ste Marie	CH_D23	Fore_left	40.144	14.162	1
	Canada	Ontario	Sault Ste Marie	CH_D23	Hind_right	45.28	18.072	1
	Canada	Ontario	Sault Ste Marie	CH_D23	Fore_right	40.503	14.253	1
	Canada	Ontario	Sault Ste Marie	CH_D24	Hind_left	37.863	20.227	4
	Canada	Ontario	Sault Ste Marie	CH_D24	Hind_right	36.979	16.656	1
	Canada	Ontario	Sault Ste Marie	CH_D24	Fore_left	32.94	12.603	1
	Canada	Ontario	Sault Ste Marie	CH_D24	Fore_right	33.491	12.752	1
	Canada	Ontario	Sault Ste Marie	CH_D25	Hind_left	45.817	19.062	1
	Canada	Ontario	Sault Ste Marie	CH_D25	Fore_left	38.509	13.019	1
	Canada	Ontario	Sault Ste Marie	CH_D25	Hind_right	45.163	18.35	1
	Canada	Ontario	Sault Ste Marie	CH_D25	Fore_right	37.906	12.904	1
	Canada	Ontario	Sault Ste Marie	CH_D26	Hind_left	44.151	17.538	3
	Canada	Ontario	Sault Ste Marie	CH_D26	Fore_left	38.719	12.144	1
	Canada	Ontario	Sault Ste Marie	CH_D26	Hind_right	43.996	18.71	1
	Canada	Ontario	Sault Ste Marie	CH_D26	Fore_right	39.641	12.099	1
	Canada	Ontario	Sault Ste Marie	CH_D27	Fore_left	38.625	18.206	4
	Canada	Ontario	Sault Ste Marie	CH_D27	Hind_left	45.671	21.097	4
	Canada	Ontario	Sault Ste Marie	CH_D27	Fore_right	37.603	14.047	1
	Canada	Ontario	Sault Ste Marie	CH_D27	Hind_right	43.707	19.362	4
	Canada	Ontario	Sault Ste Marie	CH_D28	Hind_left	42.925	16.068	1
	Canada	Ontario	Sault Ste Marie	CH_D28	Fore_left	38.848	12.84	1
	Canada	Ontario	Sault Ste Marie	CH_D28	Hind_right	42.822	15.709	1
	Canada	Ontario	Sault Ste Marie	CH_D28	Fore_right	38.995	12.878	1
	Canada	Ontario	Sault Ste Marie	CH_D29	Hind_left	39.876	16.564	1
	Canada	Ontario	Sault Ste Marie	CH_D29	Fore_left	35.321	13.521	1
	Canada	Ontario	Sault Ste Marie	CH_D29	Hind_right	40.061	17.08	1
	Canada	Ontario	Sault Ste Marie	CH_D29	Fore_right	36.013	16.42	3
	Canada	Ontario	Sault Ste Marie	CH_D30	Hind_left	43.314	14.392	1
	Canada	Ontario	Sault Ste Marie	CH_D30	Fore_left	37.494	12.089	1
	Canada	Ontario	Sault Ste Marie	CH_D30	Fore_right	36.836	11.361	1
	Canada	Ontario	Sault Ste Marie	CH_D30	Hind_right	42.851	14.996	4
	Canada	Ontario	Sault Ste Marie	CH_D31	Fore_left	33.191	12.443	1
	Canada	Ontario	Sault Ste Marie	CH_D31	Hind_left	35.842	17.076	1
	Canada	Ontario	Sault Ste Marie	CH_D31	Hind_right	36.122	16.076	1
	Canada	Ontario	Sault Ste Marie	CH_D31	Fore_right	33.056	11.961	1
	Canada	Ontario	Sault Ste Marie	CH_E01	Fore_left	38.396	12.764	1
	Canada	Ontario	Sault Ste Marie	CH_E01	Hind_left	43.182	17.773	1
	Canada	Ontario	Sault Ste Marie	CH_E01	Hind_right	44.232	18.882	1
	Canada	Ontario	Sault Ste Marie	CH_E01	Fore_right	38.692	12.375	1
	Canada	Ontario	Sault Ste Marie	CH_E02	Fore_left	38.33	12.299	1
	Canada	Ontario	Sault Ste Marie	CH_E02	Hind_left	44.292	17.383	1
	Canada	Ontario	Sault Ste Marie	CH_E02	Hind_right	44.643	19.206	1
	Canada	Ontario	Sault Ste Marie	CH_E02	Fore_right	40.005	19.022	4
	Canada	Ontario	Sault Ste Marie	CH_E03	Fore_left	52.993	34.573	4
	Canada	Ontario	Sault Ste Marie	CH_E03	Hind_left	51.606	21.265	1
	Canada	Ontario	Sault Ste Marie	CH_E03	Hind_right	51.241	20.527	1
	Canada	Ontario	Sault Ste Marie	CH_E03	Fore_right	45.336	12.499	1
	Canada	Ontario	Sault Ste Marie	CH_E04	Hind_left	40.138	18.574	4
	Canada	Ontario	Sault Ste Marie	CH_E04	Fore_left	36.001	15.063	1
	Canada	Ontario	Sault Ste Marie	CH_E04	Hind_right	40.319	18.656	1
	Canada	Ontario	Sault Ste Marie	CH_E04	Fore_right	35.664	12.613	1
	Canada	Ontario	Sault Ste Marie	CH_E05	Fore_left	36.133	12.795	1
	Canada	Ontario	Sault Ste Marie	CH_E05	Hind_left	39.756	16.051	1
	Canada	Ontario	Sault Ste Marie	CH_E05	Hind_right	39.096	15.915	1
	Canada	Ontario	Sault Ste Marie	CH_E05	Fore_right	35.747	12.657	1
	Canada	Ontario	Sault Ste Marie	CH_E06	Fore_left	31.613	12.375	1
	Canada	Ontario	Sault Ste Marie	CH_E06	Fore_right	30.921	12.109	1
	Canada	Ontario	Sault Ste Marie	CH_E06	Hind_left	34.92	16.421	1
	Canada	Ontario	Sault Ste Marie	CH_E06	Hind_right	35.118	16.184	1
	Canada	Ontario	Sault Ste Marie	CH_E07	Hind_left	38.395	16.505	1
	Canada	Ontario	Sault Ste Marie	CH_E07	Fore_left	33.362	11.962	1
	Canada	Ontario	Sault Ste Marie	CH_E07	Fore_right	33.519	12.607	1
	Canada	Ontario	Sault Ste Marie	CH_E07	Hind_right	36.835	15.363	1
	Canada	Ontario	Sault Ste Marie	CH_E08	Hind_left	47.987	15.372	1
	Canada	Ontario	Sault Ste Marie	CH_E08	Hind_right	47.811	17.331	4
	Canada	Ontario	Sault Ste Marie	CH_E08	Fore_left	42.858	13.883	1
	Canada	Ontario	Sault Ste Marie	CH_E08	Fore_right	42.313	13.513	1
	Canada	Ontario	Sault Ste Marie	CH_E09	Hind_left	49.61	21.442	1
	Canada	Ontario	Sault Ste Marie	CH_E09	Fore_left	48.787	15.203	1
	Canada	Ontario	Sault Ste Marie	CH_E09	Fore_right	47.722	14.819	1
	Canada	Ontario	Sault Ste Marie	CH_E09	Hind_right	50.821	22.565	1
	Canada	Ontario	Sault Ste Marie	CH_E10	Fore_left	42.178	13.649	1
	Canada	Ontario	Sault Ste Marie	CH_E10	Hind_left	46.928	17.773	1
	Canada	Ontario	Sault Ste Marie	CH_E10	Hind_right	46.547	17.533	4
	Canada	Ontario	Sault Ste Marie	CH_E10	Fore_right	42.765	16.628	3
	Canada	Ontario	Sault Ste Marie	CH_E11	Fore_left	35.765	13.948	1
	Canada	Ontario	Sault Ste Marie	CH_E11	Hind_left	41.733	21.478	1
	Canada	Ontario	Sault Ste Marie	CH_E11	Hind_right	40.397	20.135	1
	Canada	Ontario	Sault Ste Marie	CH_E11	Fore_right	34.878	13.461	1
	Canada	Ontario	Sault Ste Marie	CH_E12	Fore_left	37.806	15.11	4
	Canada	Ontario	Sault Ste Marie	CH_E12	Fore_right	36.58	12.706	1
	Canada	Ontario	Sault Ste Marie	CH_E12	Hind_left	41.899	20.276	1
	Canada	Ontario	Sault Ste Marie	CH_E12	Hind_right	42.013	20.173	1
	Canada	Ontario	Sault Ste Marie	CH_E13	Hind_left	47.945	17.962	1
	Canada	Ontario	Sault Ste Marie	CH_E13	Fore_left	42.089	14.707	1
	Canada	Ontario	Sault Ste Marie	CH_E13	Hind_right	48.07	17.431	1
	Canada	Ontario	Sault Ste Marie	CH_E13	Fore_right	41.682	14.298	1
	Canada	Ontario	Sault Ste Marie	CH_E14	Hind_left	46.472	18.117	1
	Canada	Ontario	Sault Ste Marie	CH_E14	Fore_left	40.622	13.482	1
	Canada	Ontario	Sault Ste Marie	CH_E14	Hind_right	45.701	17.626	1
	Canada	Ontario	Sault Ste Marie	CH_E14	Fore_right	40.543	13.188	1
	Canada	Ontario	Sault Ste Marie	CH_E15	Hind_left	38.831	16.475	1
	Canada	Ontario	Sault Ste Marie	CH_E15	Fore_left	34.445	12.038	1
	Canada	Ontario	Sault Ste Marie	CH_E15	Hind_right	37.872	16.061	1
	Canada	Ontario	Sault Ste Marie	CH_E15	Fore_right	34.572	11.967	1
	Canada	Ontario	Sault Ste Marie	CH_E16	Hind_left	71.348	23.003	1
	Canada	Ontario	Sault Ste Marie	CH_E16	Fore_left	76.057	22.869	1
	Canada	Ontario	Sault Ste Marie	CH_E16	Hind_right	71.465	23.005	1
	Canada	Ontario	Sault Ste Marie	CH_E16	Fore_right	75.879	21.613	1
	Canada	Ontario	Sault Ste Marie	CH_E17	Hind_left	43.428	18.23	1
	Canada	Ontario	Sault Ste Marie	CH_E17	Fore_left	40.467	14.806	1
	Canada	Ontario	Sault Ste Marie	CH_E17	Hind_right	41.774	16.77	1
	Canada	Ontario	Sault Ste Marie	CH_E17	Fore_right	39.472	13.957	1
	Canada	Ontario	Sault Ste Marie	CH_E18	Fore_left	34.136	11.738	1
	Canada	Ontario	Sault Ste Marie	CH_E18	Hind_left	38.678	18.239	1
	Canada	Ontario	Sault Ste Marie	CH_E18	Fore_right	33.472	13.372	1
	Canada	Ontario	Sault Ste Marie	CH_E18	Hind_right	38.022	18.634	1
	Canada	Ontario	Sault Ste Marie	CH_E19	Hind_left	42.164	17.097	1
	Canada	Ontario	Sault Ste Marie	CH_E19	Fore_left	38.527	11.611	1
	Canada	Ontario	Sault Ste Marie	CH_E19	Hind_right	42.617	17.624	1
	Canada	Ontario	Sault Ste Marie	CH_E19	Fore_right	39.2	11.714	1
	Canada	Ontario	Sault Ste Marie	CH_E20	Fore_left	35.471	13.178	1
	Canada	Ontario	Sault Ste Marie	CH_E20	Fore_right	35.303	12.961	1
	Canada	Ontario	Sault Ste Marie	CH_E20	Hind_left	40.328	20.487	1
	Canada	Ontario	Sault Ste Marie	CH_E20	Hind_right	40.497	20.466	1
	Canada	Ontario	Sault Ste Marie	CH_E21	Hind_left	43.015	16.079	1
	Canada	Ontario	Sault Ste Marie	CH_E21	Fore_left	43.252	15.022	1
	Canada	Ontario	Sault Ste Marie	CH_E21	Hind_right	42.603	16.606	1
	Canada	Ontario	Sault Ste Marie	CH_E21	Fore_right	41.628	13.287	1
	Canada	Ontario	Sault Ste Marie	CH_E22	Fore_left	34.016	12.725	1
	Canada	Ontario	Sault Ste Marie	CH_E22	Hind_left	37.244	17.52	1
	Canada	Ontario	Sault Ste Marie	CH_E22	Fore_right	34.341	12.482	1
	Canada	Ontario	Sault Ste Marie	CH_E22	Hind_right	39.016	18.03	1
	Canada	Ontario	Sault Ste Marie	CH_E23	Fore_left	31.835	12.579	1
	Canada	Ontario	Sault Ste Marie	CH_E23	Hind_left	35.708	17.806	1
	Canada	Ontario	Sault Ste Marie	CH_E23	Fore_right	31.467	13.142	1
	Canada	Ontario	Sault Ste Marie	CH_E23	Hind_right	34.928	17.658	1
	Canada	Ontario	Sault Ste Marie	CH_E24	Fore_left	35.482	12.362	1
	Canada	Ontario	Sault Ste Marie	CH_E24	Hind_left	39.871	17.37	1
	Canada	Ontario	Sault Ste Marie	CH_E24	Fore_right	34.778	12.319	1
	Canada	Ontario	Sault Ste Marie	CH_E24	Hind_right	46.71	23.866	4
	Canada	Ontario	Sault Ste Marie	CH_E25	Fore_left	32.751	13.291	1
	Canada	Ontario	Sault Ste Marie	CH_E25	Hind_left	36.782	18.566	1
	Canada	Ontario	Sault Ste Marie	CH_E25	Fore_right	32.832	13.127	1
	Canada	Ontario	Sault Ste Marie	CH_E25	Hind_right	35.582	16.692	1
	Canada	Ontario	Sault Ste Marie	CH_E26	Hind_left	44.027	17.938	1
	Canada	Ontario	Sault Ste Marie	CH_E26	Hind_right	43.191	17.234	1
	Canada	Ontario	Sault Ste Marie	CH_E26	Fore_left	37.812	13.997	4
	Canada	Ontario	Sault Ste Marie	CH_E26	Fore_right	37.948	12.95	1
	Canada	Ontario	Sault Ste Marie	CH_E27	Fore_left	37.096	14.021	1
	Canada	Ontario	Sault Ste Marie	CH_E27	Hind_left	38.34	17.218	1
	Canada	Ontario	Sault Ste Marie	CH_E27	Fore_right	35.738	13.431	1
	Canada	Ontario	Sault Ste Marie	CH_E27	Hind_right	38.441	17.485	1
	Canada	Ontario	Sault Ste Marie	CH_E28	Hind_left	39.307	15.9	1
	Canada	Ontario	Sault Ste Marie	CH_E28	Hind_right	42.613	20.25	1
	Canada	Ontario	Sault Ste Marie	CH_E28	Fore_left	36.164	13.956	1
	Canada	Ontario	Sault Ste Marie	CH_E28	Fore_right	35.924	13.627	1
	Canada	Ontario	Sault Ste Marie	CH_E29	Fore_left	35.258	15.455	4
	Canada	Ontario	Sault Ste Marie	CH_E29	Fore_right	34.483	12.284	1
	Canada	Ontario	Sault Ste Marie	CH_E29	Hind_left	38.561	15.9	1
	Canada	Ontario	Sault Ste Marie	CH_E29	Hind_right	40.782	15.932	1
	Canada	Ontario	Sault Ste Marie	CH_E30	Fore_left	33.277	12.238	1
	Canada	Ontario	Sault Ste Marie	CH_E30	Hind_left	36.685	14.947	1
	Canada	Ontario	Sault Ste Marie	CH_E30	Fore_right	33.479	13.157	1
	Canada	Ontario	Sault Ste Marie	CH_E30	Hind_right	37.455	16.379	2
	Canada	Ontario	Sault Ste Marie	CH_E31	Fore_left	34.286	13.168	1
	Canada	Ontario	Sault Ste Marie	CH_E31	Hind_left	39.578	19.912	1
	Canada	Ontario	Sault Ste Marie	CH_E31	Hind_right	38.491	19.378	1
	Canada	Ontario	Sault Ste Marie	CH_E31	Fore_right	34.743	13.034	1
	Canada	Ontario	Serena Gundy Park	RS_A01	Hind_left	41.763	25.168	2
	Canada	Ontario	Serena Gundy Park	RS_A01	Fore_left	33.216	13.709	1
	Canada	Ontario	Serena Gundy Park	RS_A01	Hind_right	40.854	24.454	1
	Canada	Ontario	Serena Gundy Park	RS_A01	Fore_right	33.094	13.879	1
	Canada	Ontario	Serena Gundy Park	RS_A02	Hind_left	42.859	25.334	1
	Canada	Ontario	Serena Gundy Park	RS_A02	Fore_left	35.373	15.354	1
	Canada	Ontario	Serena Gundy Park	RS_A02	Hind_right	42.248	25.439	1
	Canada	Ontario	Serena Gundy Park	RS_A02	Fore_right	39.97	26.903	4
	Canada	Ontario	Serena Gundy Park	RS_A03	Fore_left	51.607	19.843	1
	Canada	Ontario	Serena Gundy Park	RS_A03	Hind_left	53.678	31.95	1
	Canada	Ontario	Serena Gundy Park	RS_A03	Fore_right	50.977	19.334	1
	Canada	Ontario	Serena Gundy Park	RS_A03	Hind_right	54.558	31.336	1
	Canada	Ontario	Serena Gundy Park	RS_A04	Fore_left	30.082	13.589	1
	Canada	Ontario	Serena Gundy Park	RS_A04	Hind_left	35.663	22.634	1
	Canada	Ontario	Serena Gundy Park	RS_A04	Hind_right	36.486	22.962	1
	Canada	Ontario	Serena Gundy Park	RS_A04	Fore_right	30.976	13.365	1
	Canada	Ontario	Serena Gundy Park	RS_A05	Hind_left	57.767	34.058	1
	Canada	Ontario	Serena Gundy Park	RS_A05	Fore_left	50.48	22.998	1
	Canada	Ontario	Serena Gundy Park	RS_A05	Fore_right	49.888	22.822	1
	Canada	Ontario	Serena Gundy Park	RS_A05	Hind_right	57.833	34.519	2
	Canada	Ontario	Serena Gundy Park	RS_A06	Hind_left	50.699	27.63	2
	Canada	Ontario	Serena Gundy Park	RS_A06	Fore_left	47.819	20.329	3
	Canada	Ontario	Serena Gundy Park	RS_A06	Hind_right	51.309	27.934	2
	Canada	Ontario	Serena Gundy Park	RS_A06	Fore_right	46.068	18.056	3
	Canada	Ontario	Serena Gundy Park	RS_A07	Fore_left	31.248	14.221	1
	Canada	Ontario	Serena Gundy Park	RS_A07	Hind_left	41.858	30.206	1
	Canada	Ontario	Serena Gundy Park	RS_A07	Fore_right	31.59	14.577	1
	Canada	Ontario	Serena Gundy Park	RS_A07	Hind_right	42.182	29.508	1
	Canada	Ontario	Serena Gundy Park	RS_A08	Hind_left	100.272	27.737	1
	Canada	Ontario	Serena Gundy Park	RS_A08	Fore_left	107.884	21.63	1
	Canada	Ontario	Serena Gundy Park	RS_A08	Fore_right	109.239	21.964	1
	Canada	Ontario	Serena Gundy Park	RS_A08	Hind_right	99.83	26.485	1
	Canada	Ontario	Serena Gundy Park	RS_A09	Fore_left	141.933	25.15	3
	Canada	Ontario	Serena Gundy Park	RS_A09	Fore_right	140.541	23.854	1
	Canada	Ontario	Serena Gundy Park	RS_A09	Hind_left	132.617	24.496	3
	Canada	Ontario	Serena Gundy Park	RS_A09	Hind_right	133.644	24.454	1
	Canada	Ontario	Serena Gundy Park	RS_A10	Hind_left	136.277	23.614	2
	Canada	Ontario	Serena Gundy Park	RS_A10	Hind_right	133.544	24.407	2
	Canada	Ontario	Serena Gundy Park	RS_A10	Fore_left	139.257	23.921	2
	Canada	Ontario	Serena Gundy Park	RS_A10	Fore_right	138.885	23.835	2
	Canada	Ontario	Serena Gundy Park	RS_A11	Fore_left	34.682	15.59	3
	Canada	Ontario	Serena Gundy Park	RS_A11	Hind_left	41.266	25.953	3
	Canada	Ontario	Serena Gundy Park	RS_A11	Fore_right	34.278	15.294	3
	Canada	Ontario	Serena Gundy Park	RS_A11	Hind_right	42.329	27.501	3
	Canada	Ontario	Serena Gundy Park	RS_A12	Fore_left	40.226	18.586	2
	Canada	Ontario	Serena Gundy Park	RS_A12	Hind_left	46.257	31.624	1
	Canada	Ontario	Serena Gundy Park	RS_A12	Fore_right	38.682	17.305	2
	Canada	Ontario	Serena Gundy Park	RS_A12	Hind_right	45.382	30.867	1
	Canada	Ontario	Serena Gundy Park	RS_A13	Fore_left	99.66	22.25	1
	Canada	Ontario	Serena Gundy Park	RS_A13	Hind_left	90.211	28.036	1
	Canada	Ontario	Serena Gundy Park	RS_A13	Hind_right	90.287	26.945	1
	Canada	Ontario	Serena Gundy Park	RS_A13	Fore_right	100.849	22	1
	Canada	Ontario	Serena Gundy Park	RS_A14	Hind_left	45.231	28.086	1
	Canada	Ontario	Serena Gundy Park	RS_A14	Fore_left	36.468	15.969	1
	Canada	Ontario	Serena Gundy Park	RS_A14	Hind_right	45.101	28.846	1
	Canada	Ontario	Serena Gundy Park	RS_A14	Fore_right	36.865	15.336	1
	Canada	Ontario	Serena Gundy Park	RS_A15	Hind_left	38.76	24.284	2
	Canada	Ontario	Serena Gundy Park	RS_A15	Hind_right	37.875	22.923	2
	Canada	Ontario	Serena Gundy Park	RS_A15	Fore_left	32.987	15.096	3
	Canada	Ontario	Serena Gundy Park	RS_A15	Fore_right	NA	NA	4
	Canada	Ontario	Serena Gundy Park	RS_A16	Fore_left	36.077	17.311	2
	Canada	Ontario	Serena Gundy Park	RS_A16	Hind_left	43.7	26.07	2
	Canada	Ontario	Serena Gundy Park	RS_A16	Hind_right	52.632	37.087	3
	Canada	Ontario	Serena Gundy Park	RS_A16	Fore_right	37.901	18.74	3
	Canada	Ontario	Serena Gundy Park	RS_A17	Fore_left	91.97	20.735	1
	Canada	Ontario	Serena Gundy Park	RS_A17	Hind_left	81.731	29.987	1
	Canada	Ontario	Serena Gundy Park	RS_A17	Hind_right	82.095	30.208	1
	Canada	Ontario	Serena Gundy Park	RS_A17	Fore_right	91.294	20.909	1
	Canada	Ontario	Serena Gundy Park	RS_A18	Hind_left	51.418	32.361	1
	Canada	Ontario	Serena Gundy Park	RS_A18	Fore_left	44.588	20.573	1
	Canada	Ontario	Serena Gundy Park	RS_A18	Hind_right	50.789	31.457	1
	Canada	Ontario	Serena Gundy Park	RS_A18	Fore_right	45.31	20.314	1
	Canada	Ontario	Serena Gundy Park	RS_A19	Hind_left	47.256	30.407	3
	Canada	Ontario	Serena Gundy Park	RS_A19	Fore_left	34.76	16.286	1
	Canada	Ontario	Serena Gundy Park	RS_A19	Fore_right	34.438	16.017	1
	Canada	Ontario	Serena Gundy Park	RS_A19	Hind_right	48.826	30.931	1
	Canada	Ontario	Serena Gundy Park	RS_A20	Hind_left	46.574	25.403	1
	Canada	Ontario	Serena Gundy Park	RS_A20	Fore_left	39.027	14.126	1
	Canada	Ontario	Serena Gundy Park	RS_A20	Hind_right	45.924	26.09	1
	Canada	Ontario	Serena Gundy Park	RS_A20	Fore_right	39.844	15.427	4
	Canada	Ontario	Serena Gundy Park	RS_A21	Hind_left	41.9	22.207	2
	Canada	Ontario	Serena Gundy Park	RS_A21	Fore_left	36.911	13.936	2
	Canada	Ontario	Serena Gundy Park	RS_A21	Hind_right	41.87	21.944	2
	Canada	Ontario	Serena Gundy Park	RS_A21	Fore_right	36.793	14.074	2
	Canada	Ontario	Serena Gundy Park	RS_A22	Fore_left	81.414	19.216	1
	Canada	Ontario	Serena Gundy Park	RS_A22	Hind_left	79.221	27.511	1
	Canada	Ontario	Serena Gundy Park	RS_A22	Fore_right	80.806	19.12	1
	Canada	Ontario	Serena Gundy Park	RS_A22	Hind_right	80.34	27.509	1
	Canada	Ontario	Serena Gundy Park	RS_A23	Hind_left	86.508	31.289	1
	Canada	Ontario	Serena Gundy Park	RS_A23	Fore_left	91.697	22.046	1
	Canada	Ontario	Serena Gundy Park	RS_A23	Hind_right	85.091	29.857	1
	Canada	Ontario	Serena Gundy Park	RS_A23	Fore_right	91.16	20.792	1
	Canada	Ontario	Serena Gundy Park	RS_A24	Fore_left	124.901	21.843	1
	Canada	Ontario	Serena Gundy Park	RS_A24	Hind_left	118.41	26.2	1
	Canada	Ontario	Serena Gundy Park	RS_A24	Hind_right	118.392	26.407	1
	Canada	Ontario	Serena Gundy Park	RS_A24	Fore_right	124.444	22.711	2
	Canada	Ontario	Serena Gundy Park	RS_A25	Hind_left	77.511	28.557	1
	Canada	Ontario	Serena Gundy Park	RS_A25	Fore_left	74.315	18.437	1
	Canada	Ontario	Serena Gundy Park	RS_A25	Hind_right	75.736	27.916	1
	Canada	Ontario	Serena Gundy Park	RS_A25	Fore_right	73.693	17.903	1
	Canada	Quebec	Dunany	AI_A02	Fore_left	36.054	17.041	2
	Canada	Quebec	Dunany	AI_A02	Hind_left	39.656	25.038	1
	Canada	Quebec	Dunany	AI_A02	Fore_right	34.969	14.868	2
	Canada	Quebec	Dunany	AI_A02	Hind_right	39.545	25.512	2
	Canada	Quebec	Dunany	AI_A03	Fore_left	37.228	14.787	1
	Canada	Quebec	Dunany	AI_A03	Hind_left	41.616	21.652	1
	Canada	Quebec	Dunany	AI_A03	Fore_right	36.871	13.865	1
	Canada	Quebec	Dunany	AI_A03	Hind_right	40.96	21.319	2
	Canada	Quebec	Dunany	AI_A04	Hind_left	44.345	21.367	1
	Canada	Quebec	Dunany	AI_A04	Fore_left	37.036	13.326	1
	Canada	Quebec	Dunany	AI_A04	Hind_right	45.761	22.104	1
	Canada	Quebec	Dunany	AI_A04	Fore_right	37.438	13.298	1
	Canada	Quebec	Dunany	AI_A05	Hind_left	44.502	20.838	1
	Canada	Quebec	Dunany	AI_A05	Fore_left	39.969	12.522	1
	Canada	Quebec	Dunany	AI_A05	Hind_right	43.573	19.111	1
	Canada	Quebec	Dunany	AI_A05	Fore_right	40.09	12.857	1
	Canada	Quebec	Dunany	AI_A06	Hind_left	43.685	24.795	2
	Canada	Quebec	Dunany	AI_A06	Fore_left	40.428	14.309	1
	Canada	Quebec	Dunany	AI_A06	Hind_right	43.609	23.654	1
	Canada	Quebec	Dunany	AI_A06	Fore_right	40.628	14.318	1
	Canada	Quebec	Dunany	AI_A07	Fore_left	41.231	18.189	4
	Canada	Quebec	Dunany	AI_A07	Hind_left	45.485	23.755	4
	Canada	Quebec	Dunany	AI_A07	Fore_right	40.156	14.179	1
	Canada	Quebec	Dunany	AI_A07	Hind_right	45.29	23.371	1
	Canada	Quebec	Dunany	AI_A08	Fore_left	35.277	12.995	1
	Canada	Quebec	Dunany	AI_A08	Hind_left	41.382	20.163	4
	Canada	Quebec	Dunany	AI_A08	Hind_right	41.608	19.718	2
	Canada	Quebec	Dunany	AI_A08	Fore_right	35.115	12.624	1
	Canada	Quebec	Dunany	AI_A09	Hind_left	39.762	18.981	2
	Canada	Quebec	Dunany	AI_A09	Fore_left	34.053	13.008	4
	Canada	Quebec	Dunany	AI_A09	Hind_right	39.098	19.751	4
	Canada	Quebec	Dunany	AI_A09	Fore_right	34.634	13.237	1
	Canada	Quebec	Dunany	AI_A10	Hind_left	39.479	24.345	2
	Canada	Quebec	Dunany	AI_A10	Fore_left	34.679	17.033	4
	Canada	Quebec	Dunany	AI_A10	Hind_right	37.087	19.994	1
	Canada	Quebec	Dunany	AI_A10	Fore_right	33.455	14.678	2
	Canada	Quebec	Dunany	AI_A11	Fore_left	40.433	13.347	1
	Canada	Quebec	Dunany	AI_A11	Hind_left	43.647	21.942	1
	Canada	Quebec	Dunany	AI_A11	Hind_right	45.676	23.19	1
	Canada	Quebec	Dunany	AI_A11	Fore_right	41.278	13.223	1
	Canada	Quebec	Dunany	AI_A12	Hind_left	56.041	24.895	1
	Canada	Quebec	Dunany	AI_A12	Fore_left	52.923	17.251	1
	Canada	Quebec	Dunany	AI_A12	Hind_right	54.423	24.813	1
	Canada	Quebec	Dunany	AI_A12	Fore_right	52.414	17.293	1
	Canada	Quebec	Dunany	AI_A13	Fore_left	37.669	13.77	1
	Canada	Quebec	Dunany	AI_A13	Hind_left	40.631	21.612	1
	Canada	Quebec	Dunany	AI_A13	Fore_right	36.824	13.386	1
	Canada	Quebec	Dunany	AI_A13	Hind_right	40.382	22.383	1
	Canada	Quebec	Dunany	AI_A14	Hind_left	52.342	30.279	1
	Canada	Quebec	Dunany	AI_A14	Fore_left	41.935	16.766	1
	Canada	Quebec	Dunany	AI_A14	Hind_right	51.823	29.76	1
	Canada	Quebec	Dunany	AI_A14	Fore_right	42.442	17.269	1
	Canada	Quebec	Dunany	AI_A15	Hind_left	46.528	23.855	1
	Canada	Quebec	Dunany	AI_A15	Fore_left	40.811	13.995	1
	Canada	Quebec	Dunany	AI_A15	Hind_right	46.622	23.452	1
	Canada	Quebec	Dunany	AI_A15	Fore_right	40.891	14.521	1
	Canada	Quebec	Dunany	AI_A16	Fore_left	38.988	15.745	3
	Canada	Quebec	Dunany	AI_A16	Hind_left	44.497	25.642	1
	Canada	Quebec	Dunany	AI_A16	Fore_right	39.393	15.555	4
	Canada	Quebec	Dunany	AI_A16	Hind_right	44.385	25.516	3
	Canada	Quebec	Dunany	AI_A18	Fore_left	157.882	46.686	4
	Canada	Quebec	Dunany	AI_A18	Hind_left	124.951	54.72	4
	Canada	Quebec	Dunany	AI_A18	Fore_right	155.585	46.96	4
	Canada	Quebec	Dunany	AI_A18	Hind_right	126.377	54.001	4
	Canada	Quebec	Dunany	AI_A19	Hind_left	154.848	30.652	4
	Canada	Quebec	Dunany	AI_A19	Fore_left	143.486	45.205	4
	Canada	Quebec	Dunany	AI_A19	Hind_right	107.298	48.773	4
	Canada	Quebec	Dunany	AI_A19	Fore_right	143.641	44.067	4
	Canada	Quebec	Dunany	AI_A20	Hind_left	103.085	55.637	4
	Canada	Quebec	Dunany	AI_A20	Fore_left	146.068	50.34	4
	Canada	Quebec	Dunany	AI_A20	Hind_right	104.278	55.947	4
	Canada	Quebec	Dunany	AI_A20	Fore_right	148.095	50.053	4
	Canada	Quebec	Shawinigan	AI_B01	Fore_left	37.12	15.623	4
	Canada	Quebec	Shawinigan	AI_B01	Hind_left	43.662	21.077	4
	Canada	Quebec	Shawinigan	AI_B01	Fore_right	37.612	15.26	4
	Canada	Quebec	Shawinigan	AI_B01	Hind_right	46.96	24.122	4
	Canada	Quebec	Shawinigan	AI_B02	Fore_left	43.561	19.382	4
	Canada	Quebec	Shawinigan	AI_B02	Hind_left	46.668	22.767	4
	Canada	Quebec	Shawinigan	AI_B02	Fore_right	42.024	14.747	4
	Canada	Quebec	Shawinigan	AI_B02	Hind_right	48.233	20.915	4
	Canada	Quebec	Shawinigan	AI_B03	Fore_left	42.283	15.09	1
	Canada	Quebec	Shawinigan	AI_B03	Hind_left	48.798	23.044	4
	Canada	Quebec	Shawinigan	AI_B03	Hind_right	46.48	22.935	2
	Canada	Quebec	Shawinigan	AI_B03	Fore_right	41.08	15.124	1
	Canada	Quebec	Shawinigan	AI_B05	Hind_left	49.106	23.515	2
	Canada	Quebec	Shawinigan	AI_B05	Fore_left	43.874	14.312	1
	Canada	Quebec	Shawinigan	AI_B05	Hind_right	48.183	24.705	2
	Canada	Quebec	Shawinigan	AI_B05	Fore_right	43.541	14.901	1
	Canada	Quebec	Shawinigan	AI_B06	Fore_left	36.588	14.268	1
	Canada	Quebec	Shawinigan	AI_B06	Hind_left	46.468	26.532	4
	Canada	Quebec	Shawinigan	AI_B06	Fore_right	35.597	14.054	1
	Canada	Quebec	Shawinigan	AI_B06	Hind_right	44.959	25.757	4
	Canada	Quebec	Shawinigan	AI_B07	Fore_left	39.004	15.048	4
	Canada	Quebec	Shawinigan	AI_B07	Hind_left	41.336	22.541	1
	Canada	Quebec	Shawinigan	AI_B07	Fore_right	39.046	15.811	4
	Canada	Quebec	Shawinigan	AI_B07	Hind_right	42.176	22.166	3
	Canada	Quebec	Shawinigan	AI_B08	Fore_left	40.441	14.17	1
	Canada	Quebec	Shawinigan	AI_B08	Hind_left	43.964	19.996	1
	Canada	Quebec	Shawinigan	AI_B08	Fore_right	41.449	21.83	3
	Canada	Quebec	Shawinigan	AI_B08	Hind_right	42.433	19.738	2
	Canada	Quebec	Shawinigan	AI_B09	Hind_left	42.528	22.294	1
	Canada	Quebec	Shawinigan	AI_B09	Fore_left	36.728	13.186	1
	Canada	Quebec	Shawinigan	AI_B09	Fore_right	35.856	13.201	1
	Canada	Quebec	Shawinigan	AI_B09	Hind_right	40.965	21.931	4
	Canada	Quebec	Shawinigan	AI_B10	Hind_left	48.796	26.244	4
	Canada	Quebec	Shawinigan	AI_B10	Fore_left	40.796	23.517	4
	Canada	Quebec	Shawinigan	AI_B10	Fore_right	40.796	23.517	4
	Canada	Quebec	Shawinigan	AI_B10	Hind_right	41.173	24.397	4
	Canada	Quebec	Shawinigan	AI_B11	Fore_left	37.775	13.37	3
	Canada	Quebec	Shawinigan	AI_B11	Hind_left	41.326	15.126	1
	Canada	Quebec	Shawinigan	AI_B11	Fore_right	36.489	12.864	2
	Canada	Quebec	Shawinigan	AI_B11	Hind_right	40.121	16.402	3
	Canada	Quebec	Shawinigan	AI_B12	Fore_left	42.367	14.27	1
	Canada	Quebec	Shawinigan	AI_B12	Hind_left	47.935	18.831	1
	Canada	Quebec	Shawinigan	AI_B12	Fore_right	41.454	14.626	1
	Canada	Quebec	Shawinigan	AI_B12	Hind_right	49.004	21.074	1
	Canada	Quebec	Shawinigan	AI_B13	Fore_left	57.803	16.463	1
	Canada	Quebec	Shawinigan	AI_B13	Hind_left	60.818	25.296	3
	Canada	Quebec	Shawinigan	AI_B13	Fore_right	56.495	15.876	1
	Canada	Quebec	Shawinigan	AI_B13	Hind_right	61.184	25.723	1
	Canada	Quebec	Shawinigan	AI_B14	Fore_left	36.554	13.687	3
	Canada	Quebec	Shawinigan	AI_B14	Hind_left	40.26	19.779	1
	Canada	Quebec	Shawinigan	AI_B14	Fore_right	36.788	14.57	1
	Canada	Quebec	Shawinigan	AI_B14	Hind_right	40.847	21.295	3
	Canada	Quebec	Shawinigan	AI_B15	Fore_left	37.742	13.485	1
	Canada	Quebec	Shawinigan	AI_B15	Hind_left	44.599	20.964	1
	Canada	Quebec	Shawinigan	AI_B15	Fore_right	37.268	13.351	4
	Canada	Quebec	Shawinigan	AI_B15	Hind_right	44.877	21.808	1
	Canada	Quebec	Shawinigan	AI_B16	Fore_left	36.894	14.15	2
	Canada	Quebec	Shawinigan	AI_B16	Hind_left	43.259	25.765	1
	Canada	Quebec	Shawinigan	AI_B16	Fore_right	38.279	14.413	1
	Canada	Quebec	Shawinigan	AI_B16	Hind_right	44.023	26.152	1
	Canada	Quebec	Shawinigan	AI_B17	Fore_left	37.186	13.685	1
	Canada	Quebec	Shawinigan	AI_B17	Hind_left	43.296	23.21	1
	Canada	Quebec	Shawinigan	AI_B17	Fore_right	38.367	13.524	1
	Canada	Quebec	Shawinigan	AI_B17	Hind_right	43.103	21.939	1
	Canada	Quebec	Shawinigan	AI_B18	Fore_left	33.534	14.255	1
	Canada	Quebec	Shawinigan	AI_B18	Hind_left	40.228	20.141	4
	Canada	Quebec	Shawinigan	AI_B18	Fore_right	33.333	13.956	1
	Canada	Quebec	Shawinigan	AI_B18	Hind_right	39.638	19.687	3
	Canada	Quebec	Shawinigan	AI_B19	Fore_left	34.124	14.232	1
	Canada	Quebec	Shawinigan	AI_B19	Hind_left	39.532	23.563	1
	Canada	Quebec	Shawinigan	AI_B19	Hind_right	39.539	24.5	4
	Canada	Quebec	Shawinigan	AI_B19	Fore_right	33.959	14.114	1
	Canada	Quebec	Shawinigan	AI_B20	Hind_left	52.258	28.216	1
	Canada	Quebec	Shawinigan	AI_B20	Fore_left	48.12	16.533	1
	Canada	Quebec	Shawinigan	AI_B20	Hind_right	51.771	27.113	1
	Canada	Quebec	Shawinigan	AI_B20	Fore_right	47.283	15.389	1
	Canada	Quebec	Shawinigan	AI_B21	Hind_left	46.357	27.308	1
	Canada	Quebec	Shawinigan	AI_B22	Hind_left	40.113	25.086	3
	Canada	Quebec	Shawinigan	AI_B22	Fore_left	32.645	13.444	4
	Canada	Quebec	Shawinigan	AI_B22	Fore_right	32.31	13.773	4
	Canada	Quebec	Shawinigan	AI_B22	Hind_right	39.562	23.217	4
	Canada	Quebec	Shawinigan	AI_B23	Fore_left	32.252	13.327	1
	Canada	Quebec	Shawinigan	AI_B23	Hind_left	37.281	21.604	3
	Canada	Quebec	Shawinigan	AI_B23	Fore_right	32.206	15.208	2
	Canada	Quebec	Shawinigan	AI_B23	Hind_right	37.824	22.086	4
	Canada	Quebec	Shawinigan	AI_B24	Fore_left	38.415	14.495	3
	Canada	Quebec	Shawinigan	AI_B24	Hind_left	46.954	26.71	3
	Canada	Quebec	Shawinigan	AI_B24	Fore_right	38.097	16.329	4
	Canada	Quebec	Shawinigan	AI_B24	Hind_right	45.734	25.889	4
	Canada	Quebec	Shawinigan	AI_B25	Fore_left	37.714	15.315	1
	Canada	Quebec	Shawinigan	AI_B25	Hind_left	44.152	25.087	2
	Canada	Quebec	Shawinigan	AI_B25	Fore_right	37.558	15.083	2
	Canada	Quebec	Shawinigan	AI_B25	Hind_right	43.817	24.563	2
	Canada	Quebec	Shawinigan	AI_B26	Fore_left	34.405	13.423	1
	Canada	Quebec	Shawinigan	AI_B26	Hind_left	39.112	23.718	4
	Canada	Quebec	Shawinigan	AI_B26	Hind_right	39.492	22.387	1
	Canada	Quebec	Shawinigan	AI_B26	Fore_right	34.091	13.668	1
	Canada	Quebec	Shawinigan	AI_B27	Hind_left	39.907	28.689	3
	Canada	Quebec	Shawinigan	AI_B27	Fore_left	34.575	17.011	2
	Canada	Quebec	Shawinigan	AI_B27	Fore_right	33.634	17.199	2
	Canada	Quebec	Shawinigan	AI_B27	Hind_right	39.156	26.162	1
	Canada	Quebec	Shawinigan	AI_B28	Fore_left	36.396	13.111	2
	Canada	Quebec	Shawinigan	AI_B28	Hind_left	41.566	21.523	2
	Canada	Quebec	Shawinigan	AI_B28	Fore_right	35.763	12.696	1
	Canada	Quebec	Shawinigan	AI_B28	Hind_right	40.349	18.769	1
	Canada	Quebec	Shawinigan	AI_B29	Fore_left	35.061	14.811	4
	Canada	Quebec	Shawinigan	AI_B29	Hind_left	44.233	24.962	3
	Canada	Quebec	Shawinigan	AI_B29	Fore_right	35.177	14.467	1
	Canada	Quebec	Shawinigan	AI_B29	Hind_right	40.188	20.287	1
	Canada	Quebec	Shawinigan	AI_B30	Fore_left	33.502	14.087	2
	Canada	Quebec	Shawinigan	AI_B30	Hind_left	36.285	17.938	1
	Canada	Quebec	Shawinigan	AI_B30	Fore_right	32.366	12.758	1
	Canada	Quebec	Shawinigan	AI_B30	Hind_right	35.378	16.629	1
	Canada	Quebec	Shawinigan	AI_B31	Fore_left	32.616	12.157	1
	Canada	Quebec	Shawinigan	AI_B31	Hind_left	37.633	18.163	1
	Canada	Quebec	Shawinigan	AI_B31	Fore_right	33.277	12.263	2
	Canada	Quebec	Shawinigan	AI_B31	Hind_right	38.128	18.415	1
	Canada	Quebec	Shawinigan	AI_B32	Hind_left	37.965	17.588	1
	Canada	Quebec	Shawinigan	AI_B32	Fore_left	33.304	13.046	3
	Canada	Quebec	Shawinigan	AI_B32	Fore_right	32.938	12.716	1
	Canada	Quebec	Shawinigan	AI_B32	Hind_right	37.262	16.419	1
	Canada	Quebec	Shawinigan	AI_B33	Fore_left	39.078	13.759	3
	Canada	Quebec	Shawinigan	AI_B33	Hind_left	46.114	21.269	1
	Canada	Quebec	Shawinigan	AI_B33	Fore_right	38.851	13.541	1
	Canada	Quebec	Shawinigan	AI_B33	Hind_right	44.505	20.361	1
	USA	Arkansas	Smithville	GH_A01	Hind_left	38.719	23.824	2
	USA	Arkansas	Smithville	GH_A01	Fore_left	35.82	18.37	4
	USA	Arkansas	Smithville	GH_A01	Fore_right	35.172	19.047	4
	USA	Arkansas	Smithville	GH_A01	Hind_right	39.019	24.289	3
	USA	Arkansas	Smithville	GH_A02	Hind_left	49.714	26.896	1
	USA	Arkansas	Smithville	GH_A02	Hind_right	49.615	26.908	1
	USA	Arkansas	Smithville	GH_A02	Fore_left	45.158	16.379	1
	USA	Arkansas	Smithville	GH_A02	Fore_right	46.323	18.212	1
	USA	Arkansas	Smithville	GH_A03	Hind_left	39.888	20.868	3
	USA	Arkansas	Smithville	GH_A03	Fore_left	34.985	13.478	3
	USA	Arkansas	Smithville	GH_A03	Hind_right	40.322	20.987	3
	USA	Arkansas	Smithville	GH_A03	Fore_right	35.095	13.426	3
	USA	Arkansas	Smithville	GH_A04	Fore_left	32.408	16.44	3
	USA	Arkansas	Smithville	GH_A04	Hind_left	37.938	24.127	2
	USA	Arkansas	Smithville	GH_A04	Fore_right	32.294	14.324	3
	USA	Arkansas	Smithville	GH_A04	Hind_right	39.062	24.713	2
	USA	Arkansas	Smithville	GH_A05	Hind_left	36.267	19.869	2
	USA	Arkansas	Smithville	GH_A05	Hind_right	37.669	21.842	3
	USA	Arkansas	Smithville	GH_A05	Fore_left	32.888	14.952	3
	USA	Arkansas	Smithville	GH_A05	Fore_right	32.928	14.248	3
	USA	Arkansas	Smithville	GH_A06	Fore_left	38.771	18.838	3
	USA	Arkansas	Smithville	GH_A06	Hind_left	42.119	25.292	3
	USA	Arkansas	Smithville	GH_A06	Fore_right	38.588	18.263	3
	USA	Arkansas	Smithville	GH_A06	Hind_right	42.309	24.737	3
	USA	Arkansas	Smithville	GH_A07	Hind_left	50.48	27.156	3
	USA	Arkansas	Smithville	GH_A07	Hind_right	51.392	27.822	3
	USA	Arkansas	Smithville	GH_A07	Fore_left	50.506	18.163	3
	USA	Arkansas	Smithville	GH_A07	Fore_right	57.822	21.21	4
	USA	Arkansas	Smithville	GH_A08	Fore_left	40.468	15.705	2
	USA	Arkansas	Smithville	GH_A08	Hind_left	47.192	27.474	1
	USA	Arkansas	Smithville	GH_A08	Fore_right	41.416	16.36	3
	USA	Arkansas	Smithville	GH_A08	Hind_right	49.914	28.699	4
	USA	Arkansas	Smithville	GH_A09	Fore_left	76.481	20.987	3
	USA	Arkansas	Smithville	GH_A09	Fore_right	73.929	20.167	2
	USA	Arkansas	Smithville	GH_A09	Hind_left	71.021	27.089	1
	USA	Arkansas	Smithville	GH_A09	Hind_right	71.127	27.536	1
	USA	Arkansas	Smithville	GH_A10	Fore_left	40.533	14.835	2
	USA	Arkansas	Smithville	GH_A10	Hind_left	40.553	19.753	2
	USA	Arkansas	Smithville	GH_A10	Fore_right	39.181	13.578	2
	USA	Arkansas	Smithville	GH_A10	Hind_right	41.419	20.747	2
	USA	Arkansas	Smithville	GH_B01	Hind_left	43.471	15.922	1
	USA	Arkansas	Smithville	GH_B01	Fore_left	42.007	17.902	1
	USA	Arkansas	Smithville	GH_B01	Hind_right	43.19	15.16	1
	USA	Arkansas	Smithville	GH_B01	Fore_right	39.96	13.319	1
	USA	Arkansas	Smithville	GH_B02	Hind_left	43.172	18.945	1
	USA	Arkansas	Smithville	GH_B02	Hind_right	43.601	19.677	1
	USA	Arkansas	Smithville	GH_B02	Fore_left	39.078	13.684	1
	USA	Arkansas	Smithville	GH_B02	Fore_right	38.606	13.995	1
	USA	Arkansas	Smithville	GH_B03	Fore_left	39.653	13.641	2
	USA	Arkansas	Smithville	GH_B03	Hind_left	43.862	18.664	1
	USA	Arkansas	Smithville	GH_B03	Fore_right	39.834	15.366	2
	USA	Arkansas	Smithville	GH_B03	Hind_right	44.642	19.275	1
	USA	Arkansas	Smithville	GH_B04	Hind_left	44.825	20.247	1
	USA	Arkansas	Smithville	GH_B04	Hind_right	44.945	20.777	1
	USA	Arkansas	Smithville	GH_B04	Fore_left	40.773	14.863	1
	USA	Arkansas	Smithville	GH_B04	Fore_right	40.926	14.782	1
	USA	Arkansas	Smithville	GH_B05	Fore_left	39.819	13.829	2
	USA	Arkansas	Smithville	GH_B05	Fore_right	39.499	13.282	1
	USA	Arkansas	Smithville	GH_B05	Hind_left	45.365	23.591	4
	USA	Arkansas	Smithville	GH_B05	Hind_right	45.067	20.275	4
	USA	Arkansas	Smithville	GH_B06	Hind_left	41.964	19.531	1
	USA	Arkansas	Smithville	GH_B06	Fore_left	36.564	13.622	1
	USA	Arkansas	Smithville	GH_B06	Fore_right	36.795	13.05	1
	USA	Arkansas	Smithville	GH_B06	Hind_right	42.466	19.537	1
	USA	Arkansas	Smithville	GH_B07	Hind_left	36.53	15.819	1
	USA	Arkansas	Smithville	GH_B07	Fore_left	34.945	13.472	1
	USA	Arkansas	Smithville	GH_B07	Hind_right	42.156	22.877	2
	USA	Arkansas	Smithville	GH_B07	Fore_right	34.606	12.66	1
	USA	Arkansas	Smithville	GH_B08	Hind_left	42.366	20.484	1
	USA	Arkansas	Smithville	GH_B08	Hind_right	42.22	20.878	1
	USA	Arkansas	Smithville	GH_B08	Fore_left	37.09	13.994	1
	USA	Arkansas	Smithville	GH_B08	Fore_right	37.58	15.912	2
	USA	Arkansas	Smithville	GH_B09	Hind_left	48.496	18.461	1
	USA	Arkansas	Smithville	GH_B09	Hind_right	46.155	17.019	1
	USA	Arkansas	Smithville	GH_B09	Fore_left	43.155	13.074	1
	USA	Arkansas	Smithville	GH_B09	Fore_right	46.267	13.738	1
	USA	Arkansas	Smithville	GH_B10	Hind_left	44.788	18.492	2
	USA	Arkansas	Smithville	GH_B10	Fore_left	40.133	13.826	2
	USA	Arkansas	Smithville	GH_B10	Fore_right	40.25	14.63	2
	USA	Arkansas	Smithville	GH_B10	Hind_right	44.838	18.945	2
	USA	Arkansas	Smithville	GH_C01	Hind_left	35.424	21.456	1
	USA	Arkansas	Smithville	GH_C01	Hind_right	37.217	25.114	3
	USA	Arkansas	Smithville	GH_C01	Fore_left	30.703	14.342	2
	USA	Arkansas	Smithville	GH_C01	Fore_right	30.779	14.305	2
	USA	Arkansas	Smithville	GH_C02	Hind_left	38.381	18.265	1
	USA	Arkansas	Smithville	GH_C02	Fore_left	34.352	14.45	2
	USA	Arkansas	Smithville	GH_C02	Fore_right	34.697	14.346	2
	USA	Arkansas	Smithville	GH_C02	Hind_right	38.101	18.35	1
	USA	Arkansas	Smithville	GH_C03	Hind_left	39.693	19.544	1
	USA	Arkansas	Smithville	GH_C03	Fore_left	41.968	32.696	4
	USA	Arkansas	Smithville	GH_C03	Hind_right	39.14	19.465	1
	USA	Arkansas	Smithville	GH_C03	Fore_right	35.88	14.171	1
	USA	Arkansas	Smithville	GH_C05	Hind_left	39.302	18.212	1
	USA	Arkansas	Smithville	GH_C05	Fore_left	35.587	13.44	1
	USA	Arkansas	Smithville	GH_C05	Hind_right	39.808	18.06	1
	USA	Arkansas	Smithville	GH_C05	Fore_right	35.868	13.236	1
	USA	Arkansas	Smithville	GH_C06	Fore_left	36.034	13.549	1
	USA	Arkansas	Smithville	GH_C06	Hind_left	40.702	18.288	2
	USA	Arkansas	Smithville	GH_C06	Hind_right	40.343	16.829	1
	USA	Arkansas	Smithville	GH_C06	Fore_right	36.159	13.595	2
	USA	Arkansas	Smithville	GH_C07	Fore_left	38.971	13.905	1
	USA	Arkansas	Smithville	GH_C07	Hind_left	42.518	16.29	1
	USA	Arkansas	Smithville	GH_C07	Hind_right	43.297	19.177	3
	USA	Arkansas	Smithville	GH_C07	Fore_right	38.815	15.043	2
	USA	Arkansas	Smithville	GH_C08	Hind_left	38.669	18.909	1
	USA	Arkansas	Smithville	GH_C08	Fore_left	33.507	14.496	2
	USA	Arkansas	Smithville	GH_C08	Hind_right	37.918	18.697	1
	USA	Arkansas	Smithville	GH_C08	Fore_right	34.567	16.477	3
	USA	Arkansas	Smithville	GH_C09	Fore_left	37.734	14.36	1
	USA	Arkansas	Smithville	GH_C09	Fore_right	38.597	14.736	2
	USA	Arkansas	Smithville	GH_C09	Hind_left	40.567	18.039	2
	USA	Arkansas	Smithville	GH_C09	Hind_right	40.245	17.74	2
	USA	Arkansas	Smithville	GH_C10	Hind_left	40.184	19.562	1
	USA	Arkansas	Smithville	GH_C10	Fore_left	35.112	12.94	1
	USA	Arkansas	Smithville	GH_C10	Fore_right	35.666	13.703	1
	USA	Arkansas	Smithville	GH_C10	Hind_right	41.194	19.895	4
	USA	Arkansas	Smithville	GH_C11	Hind_left	38.214	15.81	2
	USA	Arkansas	Smithville	GH_C11	Fore_left	34.852	13.786	2
	USA	Arkansas	Smithville	GH_C11	Fore_right	34.746	12.885	1
	USA	Arkansas	Smithville	GH_C11	Hind_left	35.195	13.617	2
	USA	Arkansas	Smithville	GH_C12	Fore_left	39.916	17.016	1
	USA	Arkansas	Smithville	GH_C12	Hind_left	42.158	20.323	1
	USA	Arkansas	Smithville	GH_C12	Hind_right	42.566	21.085	1
	USA	Arkansas	Smithville	GH_C12	Fore_right	41.653	19.107	1
	USA	Arkansas	Smithville	GH_D01	Hind_left	39.404	19.904	2
	USA	Arkansas	Smithville	GH_D01	Fore_left	35.157	15.287	2
	USA	Arkansas	Smithville	GH_D01	Hind_right	39.779	19.372	3
	USA	Arkansas	Smithville	GH_D01	Fore_right	36.399	15.864	3
	USA	Arkansas	Smithville	GH_D02	Hind_left	43.411	20.88	3
	USA	Arkansas	Smithville	GH_D02	Fore_left	37.798	16.559	3
	USA	Arkansas	Smithville	GH_D02	Fore_right	37.905	16.302	3
	USA	Arkansas	Smithville	GH_D02	Hind_right	43.001	21.092	3
	USA	Arkansas	Smithville	GH_D03	Hind_left	36.34	18.785	2
	USA	Arkansas	Smithville	GH_D03	Hind_right	36.277	19.434	2
	USA	Arkansas	Smithville	GH_D03	Fore_left	32.908	16.023	3
	USA	Arkansas	Smithville	GH_D03	Fore_right	32.453	15.356	2
	USA	Florida	8 Mile Creek	RA_A01	Hind_left	32.165	13.688	1
	USA	Florida	8 Mile Creek	RA_A01	Fore_left	30.798	12.421	1
	USA	Florida	8 Mile Creek	RA_A01	Fore_right	31.081	12.142	1
	USA	Florida	8 Mile Creek	RA_A01	Hind_right	31.996	13.534	1
	USA	Florida	8 Mile Creek	RA_A02	Hind_left	59.349	23.406	1
	USA	Florida	8 Mile Creek	RA_A02	Fore_left	71.078	19.068	1
	USA	Florida	8 Mile Creek	RA_A02	Hind_right	59.795	24.349	1
	USA	Florida	8 Mile Creek	RA_A02	Fore_right	71.56	19.923	1
	USA	Florida	8 Mile Creek	RA_A03	Hind_left	34.41	14.625	1
	USA	Florida	8 Mile Creek	RA_A03	Fore_left	32.732	12.328	1
	USA	Florida	8 Mile Creek	RA_A03	Fore_right	32.262	12.142	1
	USA	Florida	8 Mile Creek	RA_A03	Hind_right	33.795	14.154	3
	USA	Florida	8 Mile Creek	RA_A04	Hind_left	35.231	14.314	1
	USA	Florida	8 Mile Creek	RA_A04	Hind_right	34.038	13.945	1
	USA	Florida	8 Mile Creek	RA_A04	Fore_left	36.227	15.513	2
	USA	Florida	8 Mile Creek	RA_A04	Fore_right	34.052	12.378	1
	USA	Florida	8 Mile Creek	RA_A05	Fore_left	29.896	12.389	1
	USA	Florida	8 Mile Creek	RA_A05	Hind_left	30.988	13.457	1
	USA	Florida	8 Mile Creek	RA_A05	Fore_right	29.421	12.641	1
	USA	Florida	8 Mile Creek	RA_A05	Hind_right	30.086	13.352	1
	USA	Florida	8 Mile Creek	RA_A06	Fore_left	33.746	13.265	1
	USA	Florida	8 Mile Creek	RA_A06	Hind_left	36.836	19.474	1
	USA	Florida	8 Mile Creek	RA_A06	Fore_right	33.506	13.016	1
	USA	Florida	8 Mile Creek	RA_A06	Hind_right	36.595	17.42	1
	USA	Florida	8 Mile Creek	RA_A07	Hind_left	34.966	15.364	1
	USA	Florida	8 Mile Creek	RA_A07	Fore_left	33.171	13.323	1
	USA	Florida	8 Mile Creek	RA_A07	Fore_right	35.553	15.437	1
	USA	Florida	8 Mile Creek	RA_A07	Hind_right	36.633	17.724	1
	USA	Florida	8 Mile Creek	RA_A08	Hind_left	30.618	14.208	1
	USA	Florida	8 Mile Creek	RA_A08	Fore_left	30.429	14.41	2
	USA	Florida	8 Mile Creek	RA_A08	Fore_right	29.627	12.78	2
	USA	Florida	8 Mile Creek	RA_A08	Hind_right	30.843	14.826	2
	USA	Florida	8 Mile Creek	RA_A09	Fore_left	31.947	13.45	1
	USA	Florida	8 Mile Creek	RA_A09	Fore_right	32.421	13.602	1
	USA	Florida	8 Mile Creek	RA_A09	Hind_left	33.441	15.56	1
	USA	Florida	8 Mile Creek	RA_A09	Hind_right	34.062	16.426	1
	USA	Florida	8 Mile Creek	RA_A10	Hind_left	33.861	14.918	1
	USA	Florida	8 Mile Creek	RA_A10	Fore_left	32.683	12.821	1
	USA	Florida	8 Mile Creek	RA_A10	Fore_right	32.544	12.861	1
	USA	Florida	8 Mile Creek	RA_A10	Hind_right	34.634	15.749	1
	USA	Florida	8 Mile Creek	RA_A11	Fore_left	43.288	16.296	1
	USA	Florida	8 Mile Creek	RA_A11	Hind_left	42.904	22.195	1
	USA	Florida	8 Mile Creek	RA_A11	Fore_right	44.667	17.113	1
	USA	Florida	8 Mile Creek	RA_A11	Hind_right	43.836	22.49	2
	USA	Florida	8 Mile Creek	RA_A12	Hind_left	39.316	19.401	1
	USA	Florida	8 Mile Creek	RA_A12	Hind_right	37.346	18.571	1
	USA	Florida	8 Mile Creek	RA_A12	Fore_left	40.342	20.341	1
	USA	Florida	8 Mile Creek	RA_A12	Fore_right	43.233	24.05	1
	USA	Florida	8 Mile Creek	RA_A13	Hind_left	76.379	27.164	1
	USA	Florida	8 Mile Creek	RA_A13	Fore_left	88.091	21.968	1
	USA	Florida	8 Mile Creek	RA_A13	Hind_right	75.36	26.455	1
	USA	Florida	8 Mile Creek	RA_A13	Fore_right	87.787	22.472	1
	USA	Florida	8 Mile Creek	RA_A14	Hind_left	33.393	16.636	4
	USA	Florida	8 Mile Creek	RA_A14	Hind_right	33.085	16.203	4
	USA	Florida	8 Mile Creek	RA_A14	Fore_left	31.912	15.092	4
	USA	Florida	8 Mile Creek	RA_A14	Fore_right	32.139	15.605	4
	USA	Florida	8 Mile Creek	RA_A15	Hind_left	31.814	14.415	1
	USA	Florida	8 Mile Creek	RA_A15	Hind_right	32.564	15.177	1
	USA	Florida	8 Mile Creek	RA_A15	Fore_left	31.436	13.583	1
	USA	Florida	8 Mile Creek	RA_A15	Fore_right	30.893	12.629	1
	USA	Florida	8 Mile Creek	RA_A16	Hind_left	34.218	14.109	1
	USA	Florida	8 Mile Creek	RA_A16	Fore_left	33.109	13.307	1
	USA	Florida	8 Mile Creek	RA_A16	Fore_right	33.342	13.785	1
	USA	Florida	8 Mile Creek	RA_A16	Hind_right	33.116	13.011	1
	USA	Florida	8 Mile Creek	RA_A17	Fore_left	31.941	13.239	1
	USA	Florida	8 Mile Creek	RA_A17	Fore_right	31.143	11.881	1
	USA	Florida	8 Mile Creek	RA_A17	Hind_left	33.012	12.841	1
	USA	Florida	8 Mile Creek	RA_A17	Hind_right	32.532	13.169	1
	USA	Florida	8 Mile Creek	RA_A18	Hind_left	33.464	15.516	2
	USA	Florida	8 Mile Creek	RA_A18	Fore_left	30.759	12.225	4
	USA	Florida	8 Mile Creek	RA_A18	Fore_right	30.648	12.821	1
	USA	Florida	8 Mile Creek	RA_A18	Hind_right	32.657	15.012	1
	USA	Florida	8 Mile Creek	RA_A19	Fore_left	34.593	13.917	2
	USA	Florida	8 Mile Creek	RA_A19	Fore_right	34.258	12.777	2
	USA	Florida	8 Mile Creek	RA_A19	Hind_left	35.152	15	2
	USA	Florida	8 Mile Creek	RA_A19	Hind_right	35.44	15.288	2
	USA	Florida	8 Mile Creek	RA_A20	Fore_left	40.527	14.533	2
	USA	Florida	8 Mile Creek	RA_A20	Fore_right	39.654	12.316	2
	USA	Florida	8 Mile Creek	RA_A20	Hind_left	41.412	15.499	2
	USA	Florida	8 Mile Creek	RA_A20	Hind_right	41.283	15.174	2
	USA	Georgia	Conyers Monastery	GB_A02	Hind_left	43.201	20.816	1
	USA	Georgia	Conyers Monastery	GB_A02	Fore_left	38.536	14.261	1
	USA	Georgia	Conyers Monastery	GB_A02	Hind_right	42.397	19.82	1
	USA	Georgia	Conyers Monastery	GB_A02	Fore_right	38.546	14.221	1
	USA	Georgia	Conyers Monastery	GB_A03	Hind_left	33.257	13.739	1
	USA	Georgia	Conyers Monastery	GB_A03	Fore_left	30.088	10.62	1
	USA	Georgia	Conyers Monastery	GB_A03	Fore_right	30.171	10.899	1
	USA	Georgia	Conyers Monastery	GB_A03	Hind_right	35.793	18.637	3
	USA	Georgia	Conyers Monastery	GB_A04	Fore_left	32.867	11.125	1
	USA	Georgia	Conyers Monastery	GB_A04	Hind_left	34.71	15.276	1
	USA	Georgia	Conyers Monastery	GB_A04	Hind_right	33.953	13.538	1
	USA	Georgia	Conyers Monastery	GB_A04	Fore_right	33.554	12.582	1
	USA	Georgia	Conyers Monastery	GB_A05	Hind_left	40.084	17.52	1
	USA	Georgia	Conyers Monastery	GB_A05	Fore_left	35.334	14.216	2
	USA	Georgia	Conyers Monastery	GB_A05	Fore_right	34.948	12.06	1
	USA	Georgia	Conyers Monastery	GB_A05	Hind_right	37.267	13.515	1
	USA	Georgia	Conyers Monastery	GB_A06	Hind_left	64.007	30.516	1
	USA	Georgia	Conyers Monastery	GB_A06	Fore_left	70.108	22.466	1
	USA	Georgia	Conyers Monastery	GB_A06	Hind_right	64.099	30.374	1
	USA	Georgia	Conyers Monastery	GB_A06	Fore_right	70.902	22.024	1
	USA	Georgia	Conyers Monastery	GB_A07	Fore_left	35.145	11.744	1
	USA	Georgia	Conyers Monastery	GB_A07	Hind_left	36.058	14.757	1
	USA	Georgia	Conyers Monastery	GB_A07	Fore_right	34.139	10.742	3
	USA	Georgia	Conyers Monastery	GB_A07	Hind_right	36.803	15.131	1
	USA	Georgia	Conyers Monastery	GB_A08	Fore_left	38.833	12.892	1
	USA	Georgia	Conyers Monastery	GB_A08	Hind_left	39.992	14.768	1
	USA	Georgia	Conyers Monastery	GB_A08	Fore_right	38.111	12.126	1
	USA	Georgia	Conyers Monastery	GB_A08	Hind_right	41.022	16.006	1
	USA	Georgia	Conyers Monastery	GB_A09	Hind_left	39.603	17.221	2
	USA	Georgia	Conyers Monastery	GB_A09	Fore_left	35.776	12.726	2
	USA	Georgia	Conyers Monastery	GB_A09	Hind_right	38.479	16.518	2
	USA	Georgia	Conyers Monastery	GB_A09	Fore_right	36.112	14.169	2
	USA	Georgia	Conyers Monastery	GB_A10	Fore_left	38.94	14.131	2
	USA	Georgia	Conyers Monastery	GB_A10	Fore_right	38.661	13.785	1
	USA	Georgia	Conyers Monastery	GB_A10	Hind_left	42.388	18.657	1
	USA	Georgia	Conyers Monastery	GB_A10	Hind_right	41.851	17.175	1
	USA	Georgia	Conyers Monastery	GB_A11	Fore_left	31.575	11.113	1
	USA	Georgia	Conyers Monastery	GB_A11	Hind_left	33.599	13.751	1
	USA	Georgia	Conyers Monastery	GB_A11	Fore_right	31.399	12.415	2
	USA	Georgia	Conyers Monastery	GB_A11	Hind_right	33.824	13.757	1
	USA	Georgia	Conyers Monastery	GB_A12	Hind_left	38.667	17.86	2
	USA	Georgia	Conyers Monastery	GB_A12	Fore_left	34.998	14.802	2
	USA	Georgia	Conyers Monastery	GB_A12	Fore_right	35.284	14.441	1
	USA	Georgia	Conyers Monastery	GB_A12	Hind_right	37.62	16.59	1
	USA	Georgia	Rome	MD_A01	Hind_left	37.054	16.918	2
	USA	Georgia	Rome	MD_A01	Fore_left	36.361	16.515	3
	USA	Georgia	Rome	MD_A01	Hind_right	36.371	17.037	2
	USA	Georgia	Rome	MD_A01	Fore_right	35.854	16.333	3
	USA	Georgia	Rome	MD_A02	Hind_left	38.551	20.026	4
	USA	Georgia	Rome	MD_A02	Fore_left	36.495	19.708	4
	USA	Georgia	Rome	MD_A02	Fore_right	37.18	20.249	4
	USA	Georgia	Rome	MD_A02	Hind_right	39.142	21.528	4
	USA	Georgia	Rome	MD_A03	Hind_left	34.787	16.971	3
	USA	Georgia	Rome	MD_A03	Fore_left	31.431	15.518	3
	USA	Georgia	Rome	MD_A03	Fore_right	32.049	16.461	3
	USA	Georgia	Rome	MD_A03	Hind_right	32.701	15.471	3
	USA	Georgia	Rome	MD_A04	Fore_left	37.91	19.441	3
	USA	Georgia	Rome	MD_A04	Hind_left	38.627	19.233	4
	USA	Georgia	Rome	MD_A04	Fore_right	38.089	19.717	4
	USA	Georgia	Rome	MD_A04	Hind_right	38.335	19.772	4
	USA	Georgia	Rome	MD_A05	Fore_left	36.36	18.791	3
	USA	Georgia	Rome	MD_A05	Hind_left	36.947	19.474	4
	USA	Georgia	Rome	MD_A05	Fore_right	36.142	19.559	3
	USA	Georgia	Rome	MD_A05	Hind_right	37.18	19.721	3
	USA	Georgia	Rome	MD_A06	Fore_left	42.115	25.704	4
	USA	Georgia	Rome	MD_A06	Fore_right	39.169	16.395	3
	USA	Georgia	Rome	MD_A06	Hind_left	41.201	22.459	4
	USA	Georgia	Rome	MD_A06	Hind_right	45.44	29.641	4
	USA	Georgia	Rome	MD_A07	Hind_left	39.184	20.796	4
	USA	Georgia	Rome	MD_A07	Hind_right	40.292	22.16	4
	USA	Georgia	Rome	MD_A07	Fore_left	37.972	20.939	4
	USA	Georgia	Rome	MD_A07	Fore_right	37.176	19.247	3
	USA	Georgia	Rome	MD_A08	Hind_left	35.785	17.985	4
	USA	Georgia	Rome	MD_A08	Fore_left	34.086	18.234	4
	USA	Georgia	Rome	MD_A08	Fore_right	33.311	14.701	3
	USA	Georgia	Rome	MD_A08	Hind_right	35.447	16.726	2
	USA	Georgia	Rome	MD_A09	Fore_left	36.753	17.396	3
	USA	Georgia	Rome	MD_A09	Hind_left	37.919	19.281	4
	USA	Georgia	Rome	MD_A09	Fore_right	34.836	14.62	3
	USA	Georgia	Rome	MD_A09	Hind_right	36.956	18.963	4
	USA	Georgia	Rome	MD_A10	Fore_left	29.593	17.02	3
	USA	Georgia	Rome	MD_A10	Hind_left	32.615	20.986	3
	USA	Georgia	Rome	MD_A10	Hind_right	32.92	22.056	3
	USA	Georgia	Rome	MD_A10	Fore_right	29.845	16.922	3
	USA	Georgia	Rome	MD_A11	Hind_left	39.676	17.402	2
	USA	Georgia	Rome	MD_A11	Fore_left	35.561	14.779	2
	USA	Georgia	Rome	MD_A11	Fore_right	35.503	14.167	3
	USA	Georgia	Rome	MD_A11	Hind_right	38.986	17.199	2
	USA	Georgia	Rome	MD_A12	Fore_left	35.948	18.904	3
	USA	Georgia	Rome	MD_A12	Hind_left	36.356	16.5	2
	USA	Georgia	Rome	MD_A12	Fore_right	35.004	17.16	3
	USA	Georgia	Rome	MD_A12	Hind_right	37.008	16.86	2
	USA	Georgia	Rome	MD_A13	Hind_left	35.256	13.832	2
	USA	Georgia	Rome	MD_A13	Hind_right	35.616	13.34	1
	USA	Georgia	Rome	MD_A13	Fore_left	34.985	13.219	2
	USA	Georgia	Rome	MD_A13	Fore_right	35.127	13.415	2
	USA	Georgia	Rome	MD_A14	Fore_left	34.442	13.597	1
	USA	Georgia	Rome	MD_A14	Fore_right	34.817	15.378	1
	USA	Georgia	Rome	MD_A14	Hind_left	40.186	23.942	1
	USA	Georgia	Rome	MD_A14	Hind_right	37.263	17.245	2
	USA	Georgia	Rome	MD_A15	Hind_left	33.953	19.669	1
	USA	Georgia	Rome	MD_A15	Hind_right	33.805	19.8	1
	USA	Georgia	Rome	MD_A15	Fore_left	29.561	13.4	2
	USA	Georgia	Rome	MD_A15	Fore_right	30.604	14.549	3
	USA	Georgia	Rome	MD_A16	Hind_left	33.338	15.65	1
	USA	Georgia	Rome	MD_A16	Hind_right	32.858	15.699	2
	USA	Georgia	Rome	MD_A16	Fore_left	30.405	13.44	2
	USA	Georgia	Rome	MD_A16	Fore_right	31.224	13.376	2
	USA	Georgia	Rome	MD_A17	Hind_left	39.971	19.175	2
	USA	Georgia	Rome	MD_A17	Fore_left	36.518	14.783	4
	USA	Georgia	Rome	MD_A17	Hind_right	39.765	19.923	1
	USA	Georgia	Rome	MD_A17	Fore_right	36.489	13.301	2
	USA	Georgia	Rome	MD_A18	Hind_left	34.267	14.229	2
	USA	Georgia	Rome	MD_A18	Fore_left	32.94	12.785	2
	USA	Georgia	Rome	MD_A18	Fore_right	32.722	12.838	2
	USA	Georgia	Rome	MD_A18	Hind_right	35.472	15.294	3
	USA	Georgia	Rome	MD_A19	Hind_left	37.532	17.529	4
	USA	Georgia	Rome	MD_A19	Fore_left	35.082	13.166	2
	USA	Georgia	Rome	MD_A19	Fore_right	34.5	12.945	4
	USA	Georgia	Rome	MD_A19	Hind_right	36.71	15.998	2
	USA	Georgia	Rome	MD_A20	Hind_left	33.324	14.886	2
	USA	Georgia	Rome	MD_A20	Fore_left	31.796	12.949	2
	USA	Georgia	Rome	MD_A20	Fore_right	32.126	12.61	2
	USA	Georgia	Rome	MD_A20	Hind_right	33.607	16.071	3
	USA	Illinois	Rockford	JE_A01	Fore_left	32.831	13.537	1
	USA	Illinois	Rockford	JE_A01	Fore_right	33.077	12.712	1
	USA	Illinois	Rockford	JE_A01	Hind_left	35.851	15.939	1
	USA	Illinois	Rockford	JE_A01	Hind_right	36.195	15.763	1
	USA	Illinois	Rockford	JE_A02	Fore_left	33.94	12.283	1
	USA	Illinois	Rockford	JE_A02	Hind_left	36.601	16.323	1
	USA	Illinois	Rockford	JE_A02	Fore_right	32.805	12.177	1
	USA	Illinois	Rockford	JE_A02	Hind_right	36.198	15.76	1
	USA	Illinois	Rockford	JE_A03	Hind_left	41.275	21.099	1
	USA	Illinois	Rockford	JE_A03	Hind_right	42.106	22.688	1
	USA	Illinois	Rockford	JE_A03	Fore_left	34.431	13.258	1
	USA	Illinois	Rockford	JE_A03	Fore_right	34.544	13.974	1
	USA	Illinois	Rockford	JE_A04	Fore_left	34.526	14.167	1
	USA	Illinois	Rockford	JE_A04	Fore_right	34.47	14.441	1
	USA	Illinois	Rockford	JE_A04	Hind_left	38.728	20.498	1
	USA	Illinois	Rockford	JE_A04	Hind_right	41.727	22.602	4
	USA	Illinois	Rockford	JE_A06	Fore_left	34.355	12.945	1
	USA	Illinois	Rockford	JE_A06	Fore_right	33.216	12.856	1
	USA	Illinois	Rockford	JE_A06	Hind_left	37.681	16.766	1
	USA	Illinois	Rockford	JE_A06	Hind_right	36.967	17.373	1
	USA	Illinois	Rockford	JE_A07	Hind_left	35.712	16.351	1
	USA	Illinois	Rockford	JE_A07	Hind_right	34.865	16.227	1
	USA	Illinois	Rockford	JE_A07	Fore_left	30.608	13.029	1
	USA	Illinois	Rockford	JE_A07	Fore_right	30.799	12.792	1
	USA	Illinois	Rockford	JE_A08	Fore_left	34.556	14.309	1
	USA	Illinois	Rockford	JE_A08	Fore_right	34.857	14.062	1
	USA	Illinois	Rockford	JE_A08	Hind_left	40.714	24.083	1
	USA	Illinois	Rockford	JE_A08	Hind_right	41.259	24.297	1
	USA	Illinois	Rockford	JE_A09	Fore_left	34.274	12.124	1
	USA	Illinois	Rockford	JE_A09	Hind_left	36.828	13.979	1
	USA	Illinois	Rockford	JE_A09	Fore_right	34.628	12.066	1
	USA	Illinois	Rockford	JE_A09	Hind_right	37.492	14.642	1
	USA	Illinois	Rockford	JE_A10	Hind_left	41.2	19.179	1
	USA	Illinois	Rockford	JE_A10	Fore_left	37.379	12.825	1
	USA	Illinois	Rockford	JE_A10	Fore_right	36.546	13.509	1
	USA	Illinois	Rockford	JE_A10	Hind_right	40.763	19.592	1
	USA	Illinois	Rockford	JE_A11	Hind_left	37.053	17.519	1
	USA	Illinois	Rockford	JE_A11	Fore_left	35.143	12.501	2
	USA	Illinois	Rockford	JE_A11	Hind_right	36.83	16.279	4
	USA	Illinois	Rockford	JE_A11	Fore_right	34.956	12.442	1
	USA	Illinois	Rockford	JE_A12	Fore_left	32.252	15.195	2
	USA	Illinois	Rockford	JE_A12	Hind_left	35.944	18.782	1
	USA	Illinois	Rockford	JE_A12	Fore_right	31.673	14.08	1
	USA	Illinois	Rockford	JE_A12	Hind_right	36.635	18.711	1
	USA	Illinois	Rockford	JE_A13	Fore_left	35.573	14.439	3
	USA	Illinois	Rockford	JE_A13	Fore_right	35.833	14.048	1
	USA	Illinois	Rockford	JE_A13	Hind_left	37.869	17.528	1
	USA	Illinois	Rockford	JE_A13	Hind_right	37.396	17.241	1
	USA	Illinois	Rockford	JE_A14	Hind_left	39.459	18.178	1
	USA	Illinois	Rockford	JE_A14	Fore_left	35.169	12.678	1
	USA	Illinois	Rockford	JE_A14	Fore_right	35.626	14.274	1
	USA	Illinois	Rockford	JE_A14	Hind_right	39.531	17.757	4
	USA	Illinois	Rockford	JE_A15	Fore_left	33.447	14.214	1
	USA	Illinois	Rockford	JE_A15	Fore_right	33.314	14.009	1
	USA	Illinois	Rockford	JE_A15	Hind_left	37.257	21.755	1
	USA	Illinois	Rockford	JE_A15	Hind_right	37.861	22.51	1
	USA	Illinois	Rockford	JE_A16	Fore_left	34.127	12.845	1
	USA	Illinois	Rockford	JE_A16	Fore_right	33.793	13.183	1
	USA	Illinois	Rockford	JE_A16	Hind_left	35.859	19.404	1
	USA	Illinois	Rockford	JE_A16	Hind_right	36.109	18.962	1
	USA	Illinois	Rockford	JE_A17	Fore_left	35.775	13.574	1
	USA	Illinois	Rockford	JE_A17	Hind_left	39.678	18.338	2
	USA	Illinois	Rockford	JE_A17	Fore_right	35.712	13.447	1
	USA	Illinois	Rockford	JE_A17	Hind_right	40.543	18.735	1
	USA	Illinois	Rockford	JE_A18	Fore_left	33.785	12.097	1
	USA	Illinois	Rockford	JE_A18	Hind_left	38.295	17.894	4
	USA	Illinois	Rockford	JE_A18	Hind_right	39.089	19.965	1
	USA	Illinois	Rockford	JE_A18	Fore_right	33.538	12.145	1
	USA	Illinois	Rockford	JE_A19	Fore_left	31.614	12.241	1
	USA	Illinois	Rockford	JE_A19	Fore_right	32.023	12.051	1
	USA	Illinois	Rockford	JE_A19	Hind_left	34.05	17.348	1
	USA	Illinois	Rockford	JE_A19	Hind_right	34.963	17.289	1
	USA	Illinois	Rockford	JE_A20	Hind_left	35.458	17.992	3
	USA	Illinois	Rockford	JE_A20	Fore_left	31.484	12.494	1
	USA	Illinois	Rockford	JE_A20	Hind_right	33.985	15.978	1
	USA	Illinois	Rockford	JE_A20	Fore_right	31.737	13.06	1
	USA	Iowa	Gateway Hills Park	JC_A01	Hind_left	38.14	24.926	1
	USA	Iowa	Gateway Hills Park	JC_A01	Fore_left	33.002	14.591	1
	USA	Iowa	Gateway Hills Park	JC_A01	Fore_right	32.635	14.128	1
	USA	Iowa	Gateway Hills Park	JC_A01	Hind_right	37.638	24.891	1
	USA	Iowa	Gateway Hills Park	JC_A02	Hind_left	30.907	17.219	1
	USA	Iowa	Gateway Hills Park	JC_A02	Hind_right	30.42	17.688	1
	USA	Iowa	Gateway Hills Park	JC_A02	Fore_left	26.276	12.531	1
	USA	Iowa	Gateway Hills Park	JC_A02	Fore_right	26.441	12.459	1
	USA	Iowa	Gateway Hills Park	JC_A03	Fore_left	38.067	14.87	1
	USA	Iowa	Gateway Hills Park	JC_A03	Hind_left	38.906	24.281	1
	USA	Iowa	Gateway Hills Park	JC_A03	Fore_right	37.259	14.426	1
	USA	Iowa	Gateway Hills Park	JC_A03	Hind_right	38.876	23.203	1
	USA	Iowa	Gateway Hills Park	JC_A04	Fore_left	144.258	19.965	1
	USA	Iowa	Gateway Hills Park	JC_A04	Fore_right	143.272	20.189	1
	USA	Iowa	Gateway Hills Park	JC_A04	Hind_left	140.198	19.061	1
	USA	Iowa	Gateway Hills Park	JC_A04	Hind_right	139.885	19.222	1
	USA	Iowa	Gateway Hills Park	JC_A05	Hind_left	30.592	18.739	1
	USA	Iowa	Gateway Hills Park	JC_A05	Hind_right	30.752	18.695	1
	USA	Iowa	Gateway Hills Park	JC_A05	Fore_left	35.35	23.583	1
	USA	Iowa	Gateway Hills Park	JC_A05	Fore_right	27.691	13.721	1
	USA	Iowa	Gateway Hills Park	JC_A06	Hind_left	124.433	23.311	1
	USA	Iowa	Gateway Hills Park	JC_A06	Fore_left	135.368	25.083	1
	USA	Iowa	Gateway Hills Park	JC_A06	Fore_right	133.756	24.112	1
	USA	Iowa	Gateway Hills Park	JC_A06	Hind_right	124.067	22.214	1
	USA	Iowa	Gateway Hills Park	JC_A07	Fore_left	29.597	13.267	1
	USA	Iowa	Gateway Hills Park	JC_A07	Fore_right	30.651	13.571	1
	USA	Iowa	Gateway Hills Park	JC_A07	Hind_left	32.948	19.539	1
	USA	Iowa	Gateway Hills Park	JC_A07	Hind_right	33.902	21.815	4
	USA	Iowa	Gateway Hills Park	JC_A08	Hind_left	124.463	23.122	1
	USA	Iowa	Gateway Hills Park	JC_A08	Fore_left	132.013	22.4	1
	USA	Iowa	Gateway Hills Park	JC_A08	Fore_right	132.212	22.499	1
	USA	Iowa	Gateway Hills Park	JC_A08	Hind_right	125.711	23.9	1
	USA	Iowa	Gateway Hills Park	JC_A09	Hind_left	136.041	17.687	1
	USA	Iowa	Gateway Hills Park	JC_A09	Hind_right	136.333	17.536	1
	USA	Iowa	Gateway Hills Park	JC_A09	Fore_left	139.33	18.567	1
	USA	Iowa	Gateway Hills Park	JC_A09	Fore_right	138.352	18.706	1
	USA	Iowa	Gateway Hills Park	JC_A10	Hind_left	88.091	23.613	1
	USA	Iowa	Gateway Hills Park	JC_A10	Fore_left	95.587	21.071	1
	USA	Iowa	Gateway Hills Park	JC_A10	Hind_right	88.654	23.647	1
	USA	Iowa	Gateway Hills Park	JC_A10	Fore_right	94.725	20.043	1
	USA	Iowa	Gateway Hills Park	JC_A11	Hind_left	65.365	28.747	1
	USA	Iowa	Gateway Hills Park	JC_A11	Fore_left	80.08	24.294	1
	USA	Iowa	Gateway Hills Park	JC_A11	Fore_right	78.32	25.007	1
	USA	Iowa	Gateway Hills Park	JC_A11	Hind_right	68	30.09	1
	USA	Iowa	Gateway Hills Park	JC_A12	Hind_left	33.74	16.84	1
	USA	Iowa	Gateway Hills Park	JC_A12	Fore_left	31.34	12.602	1
	USA	Iowa	Gateway Hills Park	JC_A12	Fore_right	31.715	12.698	1
	USA	Iowa	Gateway Hills Park	JC_A12	Hind_right	33.646	16.935	1
	USA	Iowa	Gateway Hills Park	JC_A13	Fore_left	42.964	14.09	1
	USA	Iowa	Gateway Hills Park	JC_A13	Hind_left	43.396	22.835	1
	USA	Iowa	Gateway Hills Park	JC_A13	Fore_right	42.438	13.533	1
	USA	Iowa	Gateway Hills Park	JC_A13	Hind_right	43.739	23.443	1
	USA	Iowa	Gateway Hills Park	JC_A14	Hind_left	32.743	18.538	1
	USA	Iowa	Gateway Hills Park	JC_A14	Fore_left	29.581	13.952	1
	USA	Iowa	Gateway Hills Park	JC_A14	Hind_right	33.538	19.99	1
	USA	Iowa	Gateway Hills Park	JC_A14	Fore_right	29.367	13.365	1
	USA	Iowa	Gateway Hills Park	JC_A15	Fore_left	141.816	20.794	1
	USA	Iowa	Gateway Hills Park	JC_A15	Fore_right	141.784	21.548	1
	USA	Iowa	Gateway Hills Park	JC_A15	Hind_left	135.162	20.408	1
	USA	Iowa	Gateway Hills Park	JC_A15	Hind_right	150.109	20.33	1
	USA	Iowa	Gateway Hills Park	JC_A16	Hind_left	80.158	25.081	1
	USA	Iowa	Gateway Hills Park	JC_A16	Fore_left	89.218	21.637	1
	USA	Iowa	Gateway Hills Park	JC_A16	Hind_right	82.717	25.636	1
	USA	Iowa	Gateway Hills Park	JC_A16	Fore_right	90.286	21.016	1
	USA	Iowa	Gateway Hills Park	JC_A17	Hind_left	45.249	24.422	1
	USA	Iowa	Gateway Hills Park	JC_A17	Hind_right	44.695	24.444	1
	USA	Iowa	Gateway Hills Park	JC_A17	Fore_left	42.162	14.26	1
	USA	Iowa	Gateway Hills Park	JC_A17	Fore_right	42.41	13.722	1
	USA	Iowa	Gateway Hills Park	JC_A18	Hind_left	28.953	17.443	1
	USA	Iowa	Gateway Hills Park	JC_A18	Hind_right	28.983	17.679	1
	USA	Iowa	Gateway Hills Park	JC_A18	Fore_left	25.577	12.279	1
	USA	Iowa	Gateway Hills Park	JC_A18	Fore_right	26.024	12.372	1
	USA	Iowa	Gateway Hills Park	JC_A19	Fore_left	30.903	12.377	4
	USA	Iowa	Gateway Hills Park	JC_A19	Hind_left	34.609	17.287	1
	USA	Iowa	Gateway Hills Park	JC_A19	Fore_right	30.478	12.244	1
	USA	Iowa	Gateway Hills Park	JC_A19	Hind_right	40.194	20.474	1
	USA	Iowa	Gateway Hills Park	JC_A20	Hind_left	30.742	17.87	1
	USA	Iowa	Gateway Hills Park	JC_A20	Fore_left	26.759	12.431	1
	USA	Iowa	Gateway Hills Park	JC_A20	Fore_right	26.973	12.799	1
	USA	Iowa	Gateway Hills Park	JC_A20	Hind_right	29.765	17.755	1
	USA	Iowa	Odebolt	SH_A01	Fore_left	31.208	10.966	1
	USA	Iowa	Odebolt	SH_A01	Hind_left	32.586	14.523	1
	USA	Iowa	Odebolt	SH_A01	Fore_right	31.409	10.912	1
	USA	Iowa	Odebolt	SH_A01	Hind_right	32.839	14.483	1
	USA	Iowa	Odebolt	SH_A02	Hind_left	34.981	16.548	2
	USA	Iowa	Odebolt	SH_A02	Fore_left	32.172	13.832	2
	USA	Iowa	Odebolt	SH_A02	Hind_right	34.801	14.693	2
	USA	Iowa	Odebolt	SH_A02	Fore_right	32.082	12.679	2
	USA	Iowa	Odebolt	SH_A03	Fore_left	67.95	23.663	1
	USA	Iowa	Odebolt	SH_A03	Fore_right	66.426	23.238	1
	USA	Iowa	Odebolt	SH_A03	Hind_left	67.954	19.437	1
	USA	Iowa	Odebolt	SH_A03	Hind_right	67.604	18.206	1
	USA	Iowa	Odebolt	SH_A04	Hind_left	33.565	14.725	2
	USA	Iowa	Odebolt	SH_A04	Fore_left	30.833	12.779	2
	USA	Iowa	Odebolt	SH_A04	Fore_right	30.957	12.142	2
	USA	Iowa	Odebolt	SH_A04	Hind_right	33.675	14.155	2
	USA	Iowa	Odebolt	SH_A05	Fore_left	116.92	31.761	1
	USA	Iowa	Odebolt	SH_A05	Hind_left	100.456	32.151	1
	USA	Iowa	Odebolt	SH_A05	Fore_right	116.189	32.116	1
	USA	Iowa	Odebolt	SH_A05	Hind_right	99.56	32.362	1
	USA	Iowa	Odebolt	SH_A06	Fore_left	35.272	12.798	1
	USA	Iowa	Odebolt	SH_A06	Hind_left	39.856	22.537	1
	USA	Iowa	Odebolt	SH_A06	Fore_right	35.732	12.709	1
	USA	Iowa	Odebolt	SH_A06	Hind_right	39.079	21.071	1
	USA	Iowa	Odebolt	SH_A07	Hind_left	32.675	14.984	1
	USA	Iowa	Odebolt	SH_A07	Fore_left	28.598	12.275	1
	USA	Iowa	Odebolt	SH_A07	Hind_right	33.205	16.523	1
	USA	Iowa	Odebolt	SH_A07	Fore_left	32.096	15.866	1
	USA	Iowa	Odebolt	SH_A08	Hind_left	33.609	16.968	1
	USA	Iowa	Odebolt	SH_A08	Fore_left	28.887	12.106	1
	USA	Iowa	Odebolt	SH_A08	Hind_right	34.094	17.081	1
	USA	Iowa	Odebolt	SH_A08	Fore_right	29.108	11.876	1
	USA	Iowa	Odebolt	SH_A09	Hind_left	98.107	30.979	1
	USA	Iowa	Odebolt	SH_A09	Hind_right	97.469	31.326	1
	USA	Iowa	Odebolt	SH_A09	Fore_left	111.782	28.637	1
	USA	Iowa	Odebolt	SH_A09	Fore_right	112.586	27.674	1
	USA	Iowa	Odebolt	SH_A10	Hind_left	36.599	23.023	1
	USA	Iowa	Odebolt	SH_A10	Hind_right	36.196	22.279	1
	USA	Iowa	Odebolt	SH_A10	Fore_left	32.708	12.428	1
	USA	Iowa	Odebolt	SH_A10	Fore_right	32.957	12.074	1
	USA	Iowa	Odebolt	SH_A11	Fore_left	53.991	15.806	1
	USA	Iowa	Odebolt	SH_A11	Fore_right	55.244	16.763	1
	USA	Iowa	Odebolt	SH_A11	Hind_left	57.506	23.729	1
	USA	Iowa	Odebolt	SH_A11	Hind_right	58.64	25.251	1
	USA	Iowa	Odebolt	SH_A12	Fore_left	68.787	19.244	1
	USA	Iowa	Odebolt	SH_A12	Hind_left	66.432	24.659	1
	USA	Iowa	Odebolt	SH_A12	Hind_right	66.476	24.944	1
	USA	Iowa	Odebolt	SH_A12	Fore_right	69.249	20.191	1
	USA	Iowa	Odebolt	SH_A13	Fore_left	35.429	14.084	1
	USA	Iowa	Odebolt	SH_A13	Hind_left	37.311	21.195	1
	USA	Iowa	Odebolt	SH_A13	Fore_right	33.554	12.846	1
	USA	Iowa	Odebolt	SH_A13	Hind_right	39.65	22.272	1
	USA	Iowa	Odebolt	SH_A14	Hind_left	131.931	28.461	1
	USA	Iowa	Odebolt	SH_A14	Hind_right	132.797	28.48	1
	USA	Iowa	Odebolt	SH_A14	Fore_left	135.175	28.504	1
	USA	Iowa	Odebolt	SH_A14	Fore_right	131.874	29.664	1
	USA	Iowa	Odebolt	SH_A15	Hind_left	37.429	19.349	1
	USA	Iowa	Odebolt	SH_A15	Hind_right	38.506	19.138	1
	USA	Iowa	Odebolt	SH_A15	Fore_left	35.586	11.515	1
	USA	Iowa	Odebolt	SH_A15	Fore_right	35.984	11.253	1
	USA	Iowa	Odebolt	SH_A16	Hind_left	115.889	29.957	1
	USA	Iowa	Odebolt	SH_A16	Hind_right	116.875	29.173	1
	USA	Iowa	Odebolt	SH_A16	Fore_left	128.096	30.057	1
	USA	Iowa	Odebolt	SH_A16	Fore_right	127.511	29.878	1
	USA	Iowa	Odebolt	SH_A17	Fore_left	69.854	20.133	1
	USA	Iowa	Odebolt	SH_A17	Hind_left	67.562	25.339	1
	USA	Iowa	Odebolt	SH_A17	Hind_right	67.263	24.617	1
	USA	Iowa	Odebolt	SH_A17	Fore_right	68.841	20.117	1
	USA	Iowa	Odebolt	SH_A18	Fore_left	44.079	13.295	1
	USA	Iowa	Odebolt	SH_A18	Hind_left	47.993	25.163	1
	USA	Iowa	Odebolt	SH_A18	Hind_right	48.661	24.545	1
	USA	Iowa	Odebolt	SH_A18	Fore_right	45.415	14.041	1
	USA	Iowa	Odebolt	SH_A19	Fore_left	34.896	11.589	1
	USA	Iowa	Odebolt	SH_A19	Fore_right	34.906	12.702	1
	USA	Iowa	Odebolt	SH_A19	Hind_left	39.72	16.581	1
	USA	Iowa	Odebolt	SH_A19	Hind_right	39.25	16.016	1
	USA	Iowa	Odebolt	SH_A20	Hind_left	36.917	18.528	1
	USA	Iowa	Odebolt	SH_A20	Fore_left	36.905	14.077	2
	USA	Iowa	Odebolt	SH_A20	Fore_right	35.54	11.051	1
	USA	Iowa	Odebolt	SH_A20	Hind_right	37.65	19.444	1
	USA	Iowa	Odebolt	SH_A21	Hind_left	137.861	27.541	1
	USA	Iowa	Odebolt	SH_A21	Hind_right	135.371	27.473	1
	USA	Iowa	Odebolt	SH_A21	Fore_left	135.681	27.373	1
	USA	Iowa	Odebolt	SH_A21	Fore_right	136.831	27.223	1
	USA	Iowa	Odebolt	SH_A22	Fore_left	32.886	11.369	1
	USA	Iowa	Odebolt	SH_A22	Hind_left	37.396	16.518	1
	USA	Iowa	Odebolt	SH_A22	Hind_right	37.747	16.944	1
	USA	Iowa	Odebolt	SH_A22	Fore_right	33.692	11.924	1
	USA	Iowa	Odebolt	SH_A23	Hind_left	35.287	17.846	1
	USA	Iowa	Odebolt	SH_A23	Fore_left	31.014	12.066	1
	USA	Iowa	Odebolt	SH_A23	Fore_right	30.721	11.213	1
	USA	Iowa	Odebolt	SH_A23	Hind_right	34.925	17.821	1
	USA	Iowa	Odebolt	SH_A24	Hind_left	30.271	14.072	1
	USA	Iowa	Odebolt	SH_A24	Hind_right	30.047	13.524	1
	USA	Iowa	Odebolt	SH_A24	Fore_left	27.628	10.295	1
	USA	Iowa	Odebolt	SH_A24	Fore_right	27.604	10.222	1
	USA	Iowa	Odebolt	SH_A25	Hind_left	125.84	28.439	1
	USA	Iowa	Odebolt	SH_A25	Hind_right	127.701	27.641	1
	USA	Iowa	Odebolt	SH_A25	Fore_left	132.371	27.562	1
	USA	Iowa	Odebolt	SH_A25	Fore_right	132.553	27.873	1
	USA	Iowa	Odebolt	SH_B01	Fore_left	56.795	17.87	1
	USA	Iowa	Odebolt	SH_B01	Fore_right	47.928	15.003	1
	USA	Iowa	Odebolt	SH_B01	Hind_left	46.264	23.947	1
	USA	Iowa	Odebolt	SH_B01	Hind_right	50.396	24.944	1
	USA	Iowa	Odebolt	SH_B02	Hind_left	57.662	23.905	1
	USA	Iowa	Odebolt	SH_B02	Fore_left	54.222	15.939	1
	USA	Iowa	Odebolt	SH_B02	Fore_right	57.307	17.455	1
	USA	Iowa	Odebolt	SH_B02	Hind_right	59.592	23.842	1
	USA	Iowa	Odebolt	SH_B03	Hind_left	74.179	25.39	1
	USA	Iowa	Odebolt	SH_B03	Hind_right	67.575	25.073	1
	USA	Iowa	Odebolt	SH_B03	Fore_left	74.467	23.432	1
	USA	Iowa	Odebolt	SH_B03	Fore_right	81.618	30.589	1
	USA	Iowa	Odebolt	SH_B04	Hind_left	103.635	29.423	1
	USA	Iowa	Odebolt	SH_B04	Fore_left	114.774	31.305	1
	USA	Iowa	Odebolt	SH_B04	Hind_right	104.414	29.555	1
	USA	Iowa	Odebolt	SH_B04	Fore_right	117.625	31.324	1
	USA	Iowa	Odebolt	SH_B05	Hind_left	134.545	29.846	1
	USA	Iowa	Odebolt	SH_B05	Fore_left	137.985	29.968	1
	USA	Iowa	Odebolt	SH_B05	Fore_right	138.061	29.254	1
	USA	Iowa	Odebolt	SH_B05	Hind_right	133.216	29.915	1
	USA	Iowa	Odebolt	SH_B06	Fore_left	30.41	11.225	1
	USA	Iowa	Odebolt	SH_B06	Fore_right	30.387	11.717	1
	USA	Iowa	Odebolt	SH_B06	Hind_left	32.917	16.571	1
	USA	Iowa	Odebolt	SH_B06	Hind_right	33.183	17.023	1
	USA	Iowa	Odebolt	SH_B07	Hind_left	93.411	27.931	1
	USA	Iowa	Odebolt	SH_B07	Fore_left	96.994	27.494	1
	USA	Iowa	Odebolt	SH_B07	Fore_right	97.509	26.968	1
	USA	Iowa	Odebolt	SH_B07	Hind_right	92.939	28.509	1
	USA	Iowa	Odebolt	SH_B08	Fore_left	138.292	30.723	1
	USA	Iowa	Odebolt	SH_B08	Hind_left	132.251	31.581	1
	USA	Iowa	Odebolt	SH_B08	Fore_right	138.353	31.445	1
	USA	Iowa	Odebolt	SH_B08	Hind_right	131.815	31.475	1
	USA	Iowa	Odebolt	SH_B09	Fore_left	61.535	20.937	1
	USA	Iowa	Odebolt	SH_B09	Hind_left	57.336	23.789	1
	USA	Iowa	Odebolt	SH_B09	Fore_right	61.331	20.258	1
	USA	Iowa	Odebolt	SH_B09	Hind_right	57.413	24.175	1
	USA	Iowa	Odebolt	SH_B10	Fore_left	128.787	29.745	1
	USA	Iowa	Odebolt	SH_B10	Hind_left	119.837	31.479	1
	USA	Iowa	Odebolt	SH_B10	Fore_right	128.462	28.998	1
	USA	Iowa	Odebolt	SH_B10	Hind_right	119.913	30.634	1
	USA	Iowa	Odebolt	SH_B11	Fore_left	110.689	29.204	1
	USA	Iowa	Odebolt	SH_B11	Fore_right	117.605	31.219	1
	USA	Iowa	Odebolt	SH_B11	Hind_left	104.62	28.798	1
	USA	Iowa	Odebolt	SH_B11	Hind_right	103.841	28.99	1
	USA	Iowa	Odebolt	SH_B12	Fore_left	86.734	24.984	1
	USA	Iowa	Odebolt	SH_B12	Fore_right	87.079	24.712	1
	USA	Iowa	Odebolt	SH_B12	Hind_left	79.338	26.359	1
	USA	Iowa	Odebolt	SH_B12	Hind_right	78.755	26.664	1
	USA	Iowa	Odebolt	SH_B13	Hind_left	40.555	23.293	2
	USA	Iowa	Odebolt	SH_B13	Hind_right	40.519	23.381	1
	USA	Iowa	Odebolt	SH_B13	Fore_left	37.719	14.953	1
	USA	Iowa	Odebolt	SH_B13	Fore_right	37.81	14.783	1
	USA	Iowa	Odebolt	SH_B14	Hind_left	107.11	29.649	1
	USA	Iowa	Odebolt	SH_B14	Hind_right	107.59	30.154	1
	USA	Iowa	Odebolt	SH_B14	Fore_left	114.751	28.823	1
	USA	Iowa	Odebolt	SH_B14	Fore_right	113.279	28.367	1
	USA	Iowa	Odebolt	SH_B15	Fore_left	47.438	16.516	1
	USA	Iowa	Odebolt	SH_B15	Fore_right	47.266	15.739	1
	USA	Iowa	Odebolt	SH_B15	Hind_left	47.506	23.471	1
	USA	Iowa	Odebolt	SH_B15	Hind_right	46.986	22.751	1
	USA	Iowa	Odebolt	SH_B16	Fore_left	97.164	27.16	1
	USA	Iowa	Odebolt	SH_B16	Hind_left	87.249	27.428	1
	USA	Iowa	Odebolt	SH_B16	Fore_right	95.911	27.237	1
	USA	Iowa	Odebolt	SH_B16	Hind_right	89.7	28.355	1
	USA	Iowa	Odebolt	SH_B17	Fore_left	39.745	15.474	1
	USA	Iowa	Odebolt	SH_B17	Hind_left	39.896	24.115	1
	USA	Iowa	Odebolt	SH_B17	Fore_right	39.718	14.344	1
	USA	Iowa	Odebolt	SH_B17	Hind_right	40.464	23.451	1
	USA	Iowa	Odebolt	SH_B18	Fore_left	82.229	23.378	1
	USA	Iowa	Odebolt	SH_B18	Hind_left	76.646	26.955	1
	USA	Iowa	Odebolt	SH_B18	Fore_right	80.918	24.207	1
	USA	Iowa	Odebolt	SH_B18	Hind_right	76.239	27.645	1
	USA	Iowa	Odebolt	SH_B19	Hind_left	54.228	24.743	1
	USA	Iowa	Odebolt	SH_B19	Fore_left	55.07	16.698	1
	USA	Iowa	Odebolt	SH_B19	Hind_right	53.952	24.485	1
	USA	Iowa	Odebolt	SH_B19	Fore_right	54.431	16.678	1
	USA	Iowa	Odebolt	SH_B20	Hind_left	48.413	21.751	1
	USA	Iowa	Odebolt	SH_B20	Fore_left	48.592	15.359	1
	USA	Iowa	Odebolt	SH_B20	Fore_right	49.288	16.992	1
	USA	Iowa	Odebolt	SH_B20	Hind_right	49.782	20.791	1
	USA	Iowa	Odebolt	SH_B21	Fore_left	94.993	26.569	1
	USA	Iowa	Odebolt	SH_B21	Hind_left	88.98	29.159	1
	USA	Iowa	Odebolt	SH_B21	Hind_right	87.495	28.324	1
	USA	Iowa	Odebolt	SH_B21	Fore_right	94.278	27.391	1
	USA	Iowa	Odebolt	SH_B22	Fore_left	134.604	29.793	1
	USA	Iowa	Odebolt	SH_B22	Fore_right	134.134	30.17	1
	USA	Iowa	Odebolt	SH_B22	Hind_left	130.825	32.628	1
	USA	Iowa	Odebolt	SH_B22	Hind_right	131.607	32.128	1
	USA	Iowa	Odebolt	SH_B23	Hind_left	75.655	22.022	1
	USA	Iowa	Odebolt	SH_B23	Fore_left	79.591	21.942	1
	USA	Iowa	Odebolt	SH_B23	Fore_right	80.199	22.918	1
	USA	Iowa	Odebolt	SH_B23	Hind_right	75.976	22.66	1
	USA	Iowa	Odebolt	SH_B24	Hind_left	91.789	27.693	1
	USA	Iowa	Odebolt	SH_B24	Hind_right	94.883	27.403	1
	USA	Iowa	Odebolt	SH_B24	Fore_left	103.838	25.155	1
[truncated: 1,625 more rows]
